# Supplementary material for: Metal-free I2O5-mediated direct construction of sulfonamides from thiols and amines
Source: Royal Society of Chemistry journal article supplement (doi:10.1039/c7ob00668c), 2017-01-01

## Supplementary Information

### **Metal-free I<sub>2</sub>O<sub>5</sub>-mediated direct construction of sulfonamides from thiols and amines**

Minghui Zhu, Wei Wei,\* Daoshan Yang, Huanhuan Cui, Leilei Wang, Hua Wang\*

*The Key Laboratory of Life-Organic Analysis and Key Laboratory of Pharmaceutical Intermediates and Analysis of Natural Medicine, School of Chemistry and Chemical Engineering, Qufu Normal University, Qufu 273165, Shandong, China*

*\*Phone: +86 537 4458317; Fax: +86 537 4458317.*

*E-mail: weiweiqfnu@163.com; huawang\_qfnu@126.com*

## **Contents**

|                                                                                                                               |         |
|-------------------------------------------------------------------------------------------------------------------------------|---------|
| 1. General information .....                                                                                                  | S2      |
| 2. General procedure for I <sub>2</sub> O <sub>5</sub> -mediated direct synthesis of sulfonamides from thiols and amines..... | S3      |
| 3. Preliminary mechanistic studies .....                                                                                      | S3-S4   |
| 4. Characterization data of products <b>3a–3x</b> .....                                                                       | S5-S10  |
| 5. Copies of NMR spectra for <b>3a–3x</b> .....                                                                               | S11-S34 |

## 1. General information

All commercially available reagent grade chemicals were purchased from Aldrich, Acros, Alfa Aesar and Beijing Ouhe Chemical Company and used as received without further purification unless otherwise stated.  $^1\text{H}$  NMR, and  $^{13}\text{C}$  NMR were recorded in  $\text{CDCl}_3$  on a Bruker Avance 500 spectrometer with TMS as internal standard (500 MHz  $^1\text{H}$ , 125 MHz  $^{13}\text{C}$ ) at room temperature, the chemical shifts ( $\delta$ ) were expressed in ppm and  $J$  values were given in Hz. The following abbreviations are used to indicate the multiplicity: singlet (s), doublet (d), triplet (t), quartet (q), doublet of doublets (dd), doublet of triplets (dt), and multiplet (m). All first order splitting patterns were assigned on the basis of the appearance of the multiplet. Splitting patterns that could not be easily interpreted were designated as multiplet (m). Mass analyses and HRMS were obtained on a Finnigan-LCQDECA mass spectrometer and a Bruker Daltonics Bio-TOF-Q mass spectrometer by the ESI method, respectively. Column chromatography was performed on silica gel (200-300 mesh).

## 2. General procedure for I<sub>2</sub>O<sub>5</sub>-mediated direct construction of sulfonamides from thiols and amines.

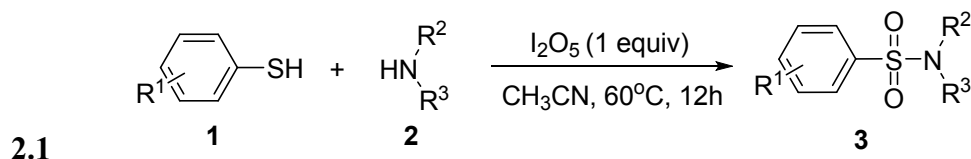

In a tube (25ml), arylthiol **1** (0.2 mmol), amine **2** (0.4 mmol), I<sub>2</sub>O<sub>5</sub> (0.2 mmol), and CH<sub>3</sub>CN (2 mL) were added. Subsequently, the tube was sealed and the reaction vessel was allowed to stir at 60 °C for 12 h. After completion of the reaction, the reaction mixture was concentrated in vacuum. The resulting mixture purified by flash column chromatography using a mixture of petroleum ether and ethyl acetate as eluent to give the desired product **3**.

## 2.2. Gram-scale reaction

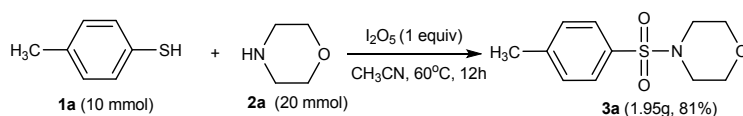

In a tube (100 ml), 4-methylbenzenethiol **1a** (10 mmol), morpholine **2a** (20 mmol), I<sub>2</sub>O<sub>5</sub> (10 mmol), and CH<sub>3</sub>CN (20 mL) were added. Then, the tube was sealed and the reaction vessel was allowed to stir at 60 °C for 12h. After completion of the reaction, the resulting mixture was concentrated under vacuum and the residue was purified by flash column chromatography using a mixture of petroleum ether and ethyl acetate as eluent to give the desired product **3a** in 81% yield (1.95g).

## 3. Preliminary mechanistic studies

### 3.1 The reaction of 4-methylbenzenethiol (**2a**) with I<sub>2</sub>O<sub>5</sub> (15 min).

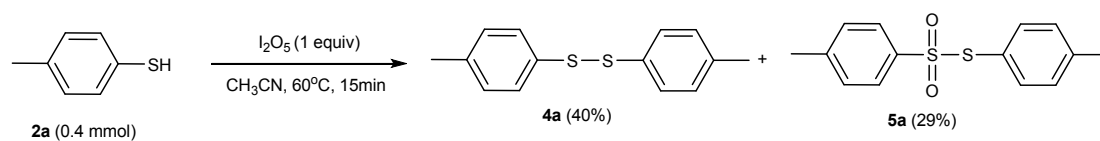

In a seal tube (15 mL), 4-methylbenzenethiol **2a** (0.4 mmol), I<sub>2</sub>O<sub>5</sub> (0.2 mmol), and CH<sub>3</sub>CN (2 mL) were added. Then, the tube was sealed and the reaction vessel was

allowed to stir at 60 °C for 15 min. After completion of the reaction, the solution was concentrated in vacuum, the product **4a** and **5a** were isolated in 40% and 29% yields, respectively.

### 3.2 The reaction of 4-methylbenzenethiol (**2a**) with I<sub>2</sub>O<sub>5</sub> (3h).

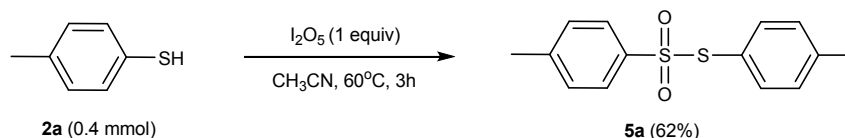

In a seal tube (15 mL), 4-methylbenzenethiol **2a** (0.4 mmol), I<sub>2</sub>O<sub>5</sub> (0.2 mmol), and CH<sub>3</sub>CN (2 mL) were added. Then, the tube was sealed and the reaction vessel was allowed to stir at 60 °C for 3h. After completion of the reaction, the solution was concentrated in vacuum, the product **5a** was isolated in 62% yield.

### 3.3 The reaction of 1,2-dip-tolyldisulfane (**4a**) with I<sub>2</sub>O<sub>5</sub>.

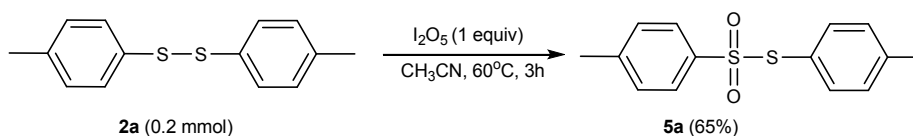

In a seal tube (15 mL), 1,2-dip-tolyldisulfane (**4a**) (0.2 mmol), I<sub>2</sub>O<sub>5</sub> (0.2 mmol), and CH<sub>3</sub>CN (2 mL) were added. Then, the tube was sealed and the reaction vessel was allowed to stir at 60 °C for 3h. After completion of the reaction, the solution was concentrated in vacuum, the product **5a** were isolated in 65% yield.

### 3.4 The reaction of sulfonyl iodide **6a** with morpholine **2a**.

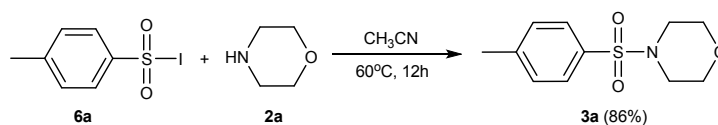

In a seal tube (15 mL), 4-methylbenzene-1-sulfonyl iodide (0.2 mmol), morpholine **2a** (0.4 mmol) and CH<sub>3</sub>CN (2 mL) were added. The reaction vessel was allowed to stir at 60 °C for 12h. After completion of the reaction, the resulting mixture was concentrated under vacuum and the residue was purified by flash column chromatography using a mixture of petroleum ether and ethyl acetate as eluent to give

the desired product **3a** in 86% yield.

#### 4. Characterization data of products

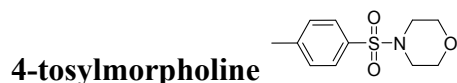

Compound **3a** was obtained in 82% yield according to the general procedure. <sup>1</sup>H NMR (CDCl<sub>3</sub>, 500 MHz, ppm): δ 7.66 (d, *J* = 8.3 Hz, 2H), 7.37 (d, *J* = 8.0 Hz, 2H), 3.76 (t, *J* = 4.7 Hz, 4H), 3.00 (t, *J* = 4.8 Hz, 4H), 2.47 (s, 3H); <sup>13</sup>C NMR (CDCl<sub>3</sub>, 125MHz, ppm): δ 143.9, 132.1, 129.7, 127.9, 66.1, 46.0, 21.6; HRMS calc. for C<sub>11</sub>H<sub>15</sub>NO<sub>3</sub>SNa (M+Na)<sup>+</sup>, 264.0670; found, 264.0675.

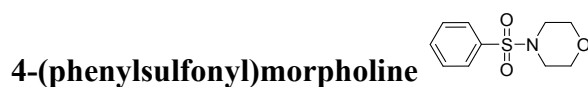

Compound **3b** was obtained in 81% yield according to the general procedure. <sup>1</sup>H NMR (CDCl<sub>3</sub>, 500 MHz, ppm): δ 7.77-7.75 (m, 2H), 7.65-7.62 (m, 1H), 7.58-7.55 (m, 2H), 3.75 (t, *J* = 4.7 Hz, 4H), 3.01 (t, *J* = 4.8 Hz, 4H); <sup>13</sup>C NMR (CDCl<sub>3</sub>, 125 MHz, ppm): δ 135.1, 133.1, 129.1, 127.8, 66.1, 46.0; HRMS calc. for C<sub>10</sub>H<sub>13</sub>NO<sub>3</sub>SNa (M+Na)<sup>+</sup>, 250.0514; found, 250.0517.

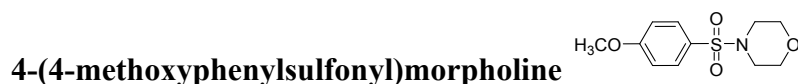

Compound **3c** was obtained in 85% yield according to the general procedure. <sup>1</sup>H NMR (CDCl<sub>3</sub>, 500 MHz, ppm): δ 7.70-7.69 (m, 2H), 7.02-7.01 (m, 2H), 3.89 (s, 3H), 3.74 (t, *J* = 4.7 Hz, 4H), 2.98 (t, *J* = 4.8 Hz, 4H); <sup>13</sup>C NMR (CDCl<sub>3</sub>, 125 MHz, ppm): δ 163.2, 130.0, 126.7, 114.3, 66.1, 55.7, 46.0; HRMS calc. for C<sub>11</sub>H<sub>15</sub>NO<sub>4</sub>SNa (M+Na)<sup>+</sup>, 280.0619; found, 280.0622.

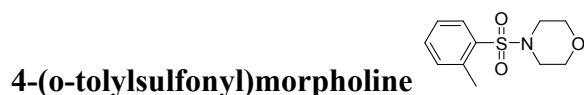

Compound **3d** was obtained in 88% yield according to the general procedure. <sup>1</sup>H NMR (CDCl<sub>3</sub>, 500 MHz, ppm): δ 7.91-7.89 (m, 1H), 7.50-7.47 (m, 1H), 7.35-7.32 (m, 2H), 3.72 (t, *J* = 4.7 Hz, 4H), 3.15 (t, *J* = 4.9 Hz, 4H), 2.65 (s, 3H); <sup>13</sup>C NMR (CDCl<sub>3</sub>, 125 MHz, ppm): δ 138.2, 135.0, 133.1, 132.9, 130.4, 126.2, 66.3, 45.3, 20.9; HRMS calc. for C<sub>11</sub>H<sub>15</sub>NO<sub>3</sub>SNa (M+Na)<sup>+</sup>, 264.0670; found, 264.0671.

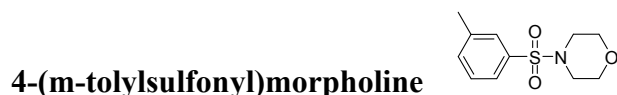

Compound **3e** was obtained in 85% yield according to the general procedure. <sup>1</sup>H NMR (CDCl<sub>3</sub>, 500 MHz, ppm): δ 7.56-7.55 (m, 2H), 7.46-7.43 (m, 2H), 3.75 (t, *J* = 4.8 Hz, 4H), 3.00 (t, *J* = 4.8 Hz, 4H), 2.45 (s, 3H); <sup>13</sup>C NMR (CDCl<sub>3</sub>, 125 MHz, ppm): δ 139.4, 134.9, 133.9, 129.0, 128.1, 125.0, 66.1, 46.0, 21.4; HRMS calc. for C<sub>11</sub>H<sub>15</sub>NO<sub>3</sub>SNa (M+Na)<sup>+</sup>, 264.0670; found, 264.0673.

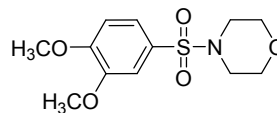

**4-(3,4-dimethoxyphenylsulfonyl)morpholine**

Compound **3f** was obtained in 81% yield according to the general procedure. <sup>1</sup>H NMR (CDCl<sub>3</sub>, 500 MHz, ppm): δ 7.39-7.36 (m, 1H), 7.21 (d, *J* = 2.1 Hz, 1H), 6.98 (d, *J* = 8.5 Hz, 1H), 3.96 (s, 3H), 3.94 (s, 3H), 3.75 (t, *J* = 4.7 Hz, 4H), 3.00 (t, *J* = 4.7 Hz, 4H); <sup>13</sup>C NMR (CDCl<sub>3</sub>, 125 MHz, ppm): δ 152.9, 152.9, 149.2, 149.1, 126.8, 121.8, 110.7, 110.7, 110.4, 110.3, 66.1, 56.3, 56.2, 46.0; HRMS calc. for C<sub>12</sub>H<sub>17</sub>NO<sub>5</sub>SNa (M+Na)<sup>+</sup>, 310.0725; found, 310.0728.

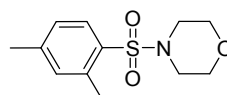

**4-(2,4-dimethylphenylsulfonyl)morpholine**

Compound **3g** was obtained in 67% yield according to the general procedure. <sup>1</sup>H NMR (CDCl<sub>3</sub>, 500 MHz, ppm): δ 7.77 (d, *J* = 7.8 Hz, 1H), 7.13 (d, *J* = 8.7 Hz, 2H), 3.72-3.71 (m, 4H), 3.14-3.12 (m, 4H), 2.60 (s, 3H), 2.38 (s, 3H); <sup>13</sup>C NMR (CDCl<sub>3</sub>, 125 MHz, ppm): δ 143.9, 138.0, 133.6, 131.8, 130.7, 126.8, 66.3, 45.3, 21.3, 20.8; HRMS calc. for C<sub>12</sub>H<sub>17</sub>NO<sub>3</sub>SNa (M+Na)<sup>+</sup>, 278.0827; found, 278.0831.

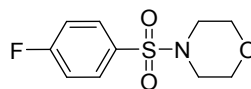

**4-(4-fluorophenylsulfonyl)morpholine**

Compound **3h** was obtained in 81% yield according to the general procedure. <sup>1</sup>H NMR (CDCl<sub>3</sub>, 500 MHz, ppm): δ 7.80-7.77 (m, 2H), 7.26-7.23 (m, 2H), 3.75 (t, *J* = 4.7 Hz, 4H), 3.00 (t, *J* = 4.8 Hz, 4H); <sup>13</sup>C NMR (CDCl<sub>3</sub>, 125 MHz, ppm): δ 165.4 (d, *J* = 254 Hz), 131.3 (d, *J* = 3.3 Hz), 130.5 (d, *J* = 9.2 Hz), 116.4 (d, *J* = 22.5 Hz), 66.1, 46.0; HRMS calc. for C<sub>10</sub>H<sub>12</sub>FNO<sub>3</sub>SNa (M+Na)<sup>+</sup>, 268.0420; found, 268.0423.

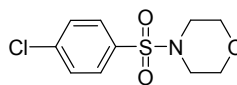

**4-(4-chlorophenylsulfonyl)morpholine**

Compound **3i** was obtained in 75% yield according to the general procedure. <sup>1</sup>H NMR (CDCl<sub>3</sub>, 500 MHz, ppm): δ 7.70 (d, *J* = 8.6 Hz, 2H), 7.54 (d, *J* = 8.6 Hz, 2H), 3.75 (t,

$J = 4.7$  Hz, 4H), 3.01 (t,  $J = 4.7$  Hz, 4H);  $^{13}\text{C}$  NMR ( $\text{CDCl}_3$ , 125 MHz, ppm):  $\delta$  139.7, 133.7, 129.5, 129.2, 66.1, 45.9; HRMS calc. for  $\text{C}_{10}\text{H}_{12}\text{ClNO}_3\text{SNa}$  ( $\text{M}+\text{Na}$ ) $^+$ , 284.0124; found, 284.0126.

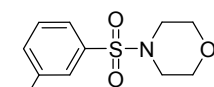

**4-(3-chlorophenylsulfonyl)morpholine**

Compound **3j** was obtained in 86% yield according to the general procedure.  $^1\text{H}$  NMR ( $\text{CDCl}_3$ , 500 MHz, ppm):  $\delta$  7.68 (t,  $J = 1.8$  Hz, 1H), 7.59-7.53 (m, 2H), 7.44 (t,  $J = 8.0$  Hz, 1H), 3.69 (t,  $J = 4.6$  Hz, 4H), 2.96 (t,  $J = 4.8$  Hz, 4H);  $^{13}\text{C}$  NMR ( $\text{CDCl}_3$ , 125 MHz, ppm):  $\delta$  136.0, 134.5, 132.2, 129.4, 126.8, 124.9, 65.0, 44.9; HRMS calc. for  $\text{C}_{10}\text{H}_{12}\text{ClNO}_3\text{SNa}$  ( $\text{M}+\text{Na}$ ) $^+$ , 284.0124; found, 284.0119.

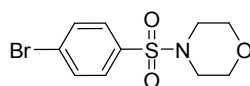

**4-(4-bromophenylsulfonyl)morpholine**

Compound **3k** was obtained in 62% yield according to the general procedure.  $^1\text{H}$  NMR ( $\text{CDCl}_3$ , 500 MHz, ppm):  $\delta$  7.70 (d,  $J = 8.6$  Hz, 2H), 7.62 (d,  $J = 8.6$  Hz, 2H), 3.75 (t,  $J = 4.8$  Hz, 4H), 3.00 (t,  $J = 4.8$ , 4H);  $^{13}\text{C}$  NMR ( $\text{CDCl}_3$ , 125 MHz, ppm):  $\delta$  134.2, 132.5, 129.3, 128.2, 66.0, 45.9; HRMS calc. for  $\text{C}_{10}\text{H}_{12}\text{BrNO}_3\text{SNa}$  ( $\text{M}+\text{Na}$ ) $^+$ , 327.9619; found, 327.9621.

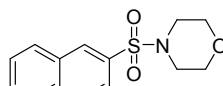

**4-(naphthalen-2-ylsulfonyl)morpholine**

Compound **3l** was obtained in 75% yield according to the general procedure.  $^1\text{H}$  NMR ( $\text{CDCl}_3$ , 500 MHz, ppm):  $\delta$  8.34 (d,  $J = 1.8$  Hz, 1H), 8.01-7.98 (m, 2H), 7.94 (d,  $J = 8.1$  Hz, 1H), 7.76-7.74 (m, 1H), 7.69-7.62 (m, 2H), 3.75 (t,  $J = 4.8$  Hz, 4H), 3.07 (t,  $J = 4.8$  Hz, 4H);  $^{13}\text{C}$  NMR ( $\text{CDCl}_3$ , 125 MHz, ppm):  $\delta$  135.0, 132.3, 132.2, 129.3, 129.3, 129.2, 129.0, 128.0, 127.7, 123.0, 66.1, 46.1; HRMS calc. for  $\text{C}_{14}\text{H}_{15}\text{NO}_3\text{SNa}$  ( $\text{M}+\text{Na}$ ) $^+$ , 300.0670; found, 300.0673.

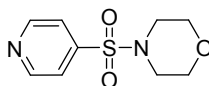

**4-(pyridin-4-ylsulfonyl)morpholine**

Compound **3m** was obtained in 60% yield according to the general procedure.  $^1\text{H}$  NMR ( $\text{CDCl}_3$ , 500 MHz, ppm):  $\delta$  8.90 (d,  $J = 4.1$  Hz, 2H), 7.60 (d,  $J = 5.8$  Hz, 2H), 3.76 (t,  $J = 4.8$  Hz, 4H), 3.06 (t,  $J = 4.7$  Hz, 4H);  $^{13}\text{C}$  NMR ( $\text{CDCl}_3$ , 125MHz, ppm):  $\delta$  151.2, 143.6, 120.9, 66.0, 45.9; HRMS calc. for  $\text{C}_9\text{H}_{12}\text{N}_2\text{O}_3\text{SNa}$  ( $\text{M}+\text{Na}$ ) $^+$ , 251.0466; found, 251.0467.

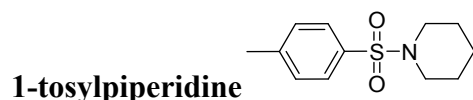

Compound **3n** was obtained in 64% yield according to the general procedure.  $^1\text{H}$  NMR ( $\text{CDCl}_3$ , 500 MHz, ppm):  $\delta$  7.66 (d,  $J$  = 8.3 Hz, 2H), 7.34 (d,  $J$  = 8.0 Hz, 2H), 2.99 (t,  $J$  = 5.5 Hz, 4H), 2.45 (s, 3H), 1.68-1.63 (m, 4H), 1.45-1.41 (m, 2H);  $^{13}\text{C}$  NMR ( $\text{CDCl}_3$ , 125 MHz, ppm):  $\delta$  143.3, 133.3, 129.5, 127.7, 46.9, 25.2, 23.5, 21.5; HRMS calc. for  $\text{C}_{12}\text{H}_{17}\text{NO}_2\text{SNa}$  ( $\text{M}+\text{Na}$ ) $^+$ , 262.0878; found, 262.0879.

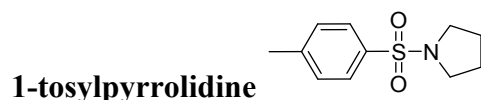

Compound **3o** was obtained in 56% yield according to the general procedure.  $^1\text{H}$  NMR ( $\text{CDCl}_3$ , 500 MHz, ppm):  $\delta$  7.74 (d,  $J$  = 8.3 Hz, 2H), 7.34 (d,  $J$  = 8.0 Hz, 2H), 3.26-3.24 (m, 4H), 2.45 (s, 3H), 1.78-1.75 (m, 4H);  $^{13}\text{C}$  NMR ( $\text{CDCl}_3$ , 125 MHz, ppm):  $\delta$  143.3, 133.9, 129.6, 127.6, 47.9, 25.2, 21.5; HRMS calc. for  $\text{C}_{11}\text{H}_{15}\text{NO}_2\text{SNa}$  ( $\text{M}+\text{Na}$ ) $^+$ , 248.0721; found, 248.0727.

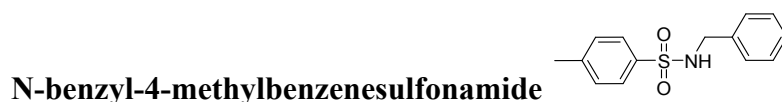

Compound **3p** was obtained in 63% yield according to the general procedure.  $^1\text{H}$  NMR ( $\text{CDCl}_3$ , 500 MHz, ppm):  $\delta$  7.76 (d,  $J$  = 8.3 Hz, 2H), 7.32-7.25 (m, 5H), 7.20-7.19 (m, 2H), 4.67 (d,  $J$  = 5.7 Hz, 1H), 4.12 (d,  $J$  = 6.2 Hz, 2H), 2.44 (s, 3H);  $^{13}\text{C}$  NMR ( $\text{CDCl}_3$ , 125 MHz, ppm):  $\delta$  143.5, 136.9, 136.3, 129.8, 128.7, 127.9, 127.9, 127.2, 47.3, 21.6; HRMS calc. for  $\text{C}_{14}\text{H}_{15}\text{NO}_2\text{SNa}$  ( $\text{M}+\text{Na}$ ) $^+$ , 284.0721; found, 284.0723.

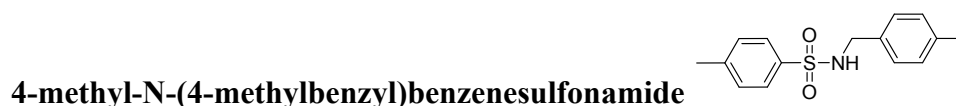

Compound **3q** was obtained in 60% yield according to the general procedure.  $^1\text{H}$  NMR ( $\text{CDCl}_3$ , 500 MHz, ppm):  $\delta$  7.64 (d,  $J$  = 8.2 Hz, 2H), 7.32 (d,  $J$  = 7.9 Hz, 2H), 7.16 (d,  $J$  = 8.2 Hz, 2H), 7.12 (d,  $J$  = 8.0 Hz, 2H), 4.24 (brs, 1H), 4.22-4.19 (m, 1H), 3.87-3.83 (m, 1H), 2.42 (s, 3H), 2.32 (s, 3H);  $^{13}\text{C}$  NMR ( $\text{CDCl}_3$ , 125 MHz, ppm):  $\delta$  141.3, 140.9, 137.4, 134.7, 129.6, 129.3, 128.3, 126.0, 44.4, 21.4, 21.1; HRMS calc. for  $\text{C}_{15}\text{H}_{17}\text{NO}_2\text{SNa}$  ( $\text{M}+\text{Na}$ ) $^+$ , 298.0878, found, 298.0881.

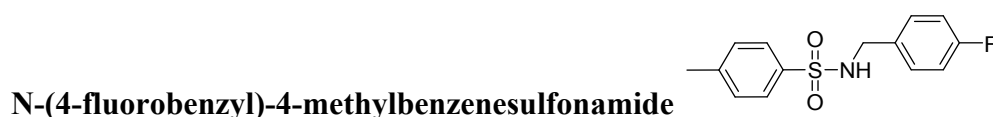



Compound **3r** was obtained in 61% yield according to the general procedure.  $^1\text{H}$  NMR ( $\text{CDCl}_3$ , 500 MHz, ppm):  $\delta$  7.63 (d,  $J$  = 8.3 Hz, 2H), 7.33-7.31 (m, 2H), 7.25-7.22 (m, 2H), 6.99 (t,  $J$  = 8.7 Hz, 2H), 4.30 (t,  $J$  = 1.6 Hz, 1H), 4.23-4.19 (m, 1H), 3.90-3.86 (m, 1H) 2.42 (s, 3H);  $^{13}\text{C}$  NMR ( $\text{CDCl}_3$ , 125 MHz, ppm):  $\delta$  162.2 (d,  $J$  = 244.7 Hz), 141.5, 140.7, 133.6 (d,  $J$  = 3.2 Hz), 130.0 (d,  $J$  = 8.1 Hz), 129.7, 126.4, 126.0, 115.6 (d,  $J$  = 21.6 Hz), 44.0, 21.4; HRMS calc. for  $\text{C}_{14}\text{H}_{14}\text{FNO}_2\text{SNa}$  ( $\text{M}+\text{Na}$ ) $^+$ , 302.0627; found, 302.0625.

**N-(4-chlorobenzyl)-4-methylbenzenesulfonamide**

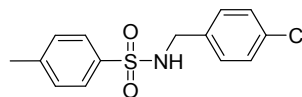

Compound **3s** was obtained in 67% yield according to the general procedure.  $^1\text{H}$  NMR ( $\text{CDCl}_3$ , 500 MHz, ppm):  $\delta$  7.63 (d,  $J$  = 7.9 Hz, 2H), 7.32 (d,  $J$  = 8.0 Hz, 2H), 7.27 (d,  $J$  = 8.3 Hz, 2H), 7.20 (d,  $J$  = 8.2 Hz, 2H), 4.32-4.28 (m, 1H), 4.22-4.18 (m, 1H), 3.91-3.87 (m, 1H), 2.42 (s, 3H);  $^{13}\text{C}$  NMR ( $\text{CDCl}_3$ , 125 MHz, ppm):  $\delta$  141.5, 140.7, 136.4, 133.5, 129.7, 128.8, 125.9, 44.0, 21.4; HRMS calc. for  $\text{C}_{14}\text{H}_{14}\text{ClNO}_2\text{SNa}$  ( $\text{M}+\text{Na}$ ) $^+$ , 318.0331; found, 318.0333.

**N-(4-bromobenzyl)-4-methylbenzenesulfonamide**

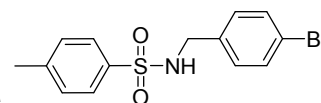

Compound **3t** was obtained in 53% yield according to the general procedure.  $^1\text{H}$  NMR ( $\text{CDCl}_3$ , 500 MHz, ppm):  $\delta$  7.62 (d,  $J$  = 8.3 Hz, 2H), 7.43 (d,  $J$  = 8.4 Hz, 2H), 7.31 (d,  $J$  = 8.0 Hz, 2H), 7.14 (d,  $J$  = 8.4 Hz, 2H), 4.31 (t,  $J$  = 6.2 Hz, 1H), 4.20-4.16 (m, 1H), 3.90-3.85 (m, 1H), 2.42 (s, 3H);  $^{13}\text{C}$  NMR ( $\text{CDCl}_3$ , 125 MHz, ppm):  $\delta$  141.6, 140.7, 136.9, 131.7, 130.0, 129.7, 125.9, 121.6, 44.0, 21.4; HRMS calc. for  $\text{C}_{14}\text{H}_{14}\text{BrNO}_2\text{SNa}$  ( $\text{M}+\text{Na}$ ) $^+$ , 361.9826; found, 361.9829.

**N-(2-bromobenzyl)-4-methylbenzenesulfonamide**

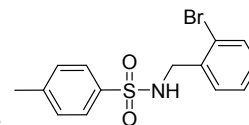

Compound **3u** was obtained in 60% yield according to the general procedure.  $^1\text{H}$  NMR ( $\text{CDCl}_3$ , 500 MHz, ppm):  $\delta$  7.63 (d,  $J$  = 8.3 Hz, 2H), 7.53 (d,  $J$  = 7.6 Hz, 1H), 7.30 (d,  $J$  = 7.9 Hz, 2H), 7.25-7.24 (m, 2H), 7.15-7.11 (m, 1H), 4.46 (t,  $J$  = 6.7 Hz, 1H), 4.37-4.33 (m, 1H), 4.09-4.04 (m, 1H), 2.41 (s, 3H);  $^{13}\text{C}$  NMR ( $\text{CDCl}_3$ , 125 MHz, ppm):  $\delta$  140.4, 139.8, 136.3, 131.9, 129.5, 128.5, 128.3, 126.6, 125.0, 123.0, 44.3, 20.3; HRMS calc. for  $\text{C}_{14}\text{H}_{14}\text{BrNO}_2\text{SNa}$  ( $\text{M}+\text{Na}$ ) $^+$ , 361.9826; found, 361.9831.

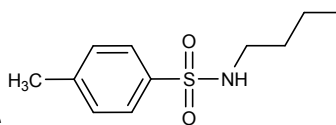

#### N-butyl-4-methylbenzenesulfonamide

Compound **3v** was obtained in 56% yield according to the general procedure.  $^1\text{H}$  NMR ( $\text{CDCl}_3$ , 500 MHz, ppm):  $\delta$  7.75 (t,  $J$  = 8.3 Hz, 2H), 7.30 (t,  $J$  = 8.0 Hz, 2H), 4.70 (brs, 1H), 2.94-2.90 (m, 2H), 2.43 (s, 3H), 1.46-1.41 (m, 2H), 1.31-1.26 (m, 2H), 0.84 (t,  $J$  = 7.4 Hz, 3H);  $^{13}\text{C}$  NMR ( $\text{CDCl}_3$ , 125MHz, ppm):  $\delta$  143.3, 137.0, 129.7, 127.1, 42.9, 31.6, 21.5, 19.7, 13.5; HRMS calc. for  $\text{C}_{11}\text{H}_{17}\text{NO}_2\text{SNa}$  ( $\text{M}+\text{Na}$ ) $^+$ , 250.0878; found, 250.0877.

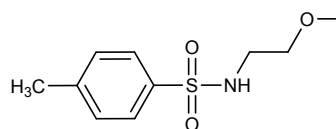

#### N-(ethoxymethyl)-4-methylbenzenesulfonamide

Compound **3w** was obtained in 57% yield according to the general procedure.  $^1\text{H}$  NMR ( $\text{CDCl}_3$ , 500 MHz, ppm):  $\delta$  7.59 (d,  $J$  = 8.2 Hz, 2H), 7.29 (t,  $J$  = 8.0 Hz, 2H), 4.51 (s, 1H), 3.49-3.42 (m, 2H), 3.33 (s, 3H), 3.29-3.24 (m, 1H), 2.96-2.90 (m, 1H), 2.41 (s, 3H);  $^{13}\text{C}$  NMR ( $\text{CDCl}_3$ , 125MHz, ppm):  $\delta$  141.2, 136.5, 129.6, 126.0, 71.9, 58.7, 40.3, 21.3; HRMS calc. for  $\text{C}_{10}\text{H}_{15}\text{NO}_3\text{SNa}$  ( $\text{M}+\text{Na}$ ) $^+$ , 252.0670; found, 252.0673.

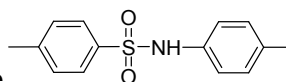

#### 4-methyl-N-p-tolylbenzenesulfonamide

Compound **3x** was obtained in 42% yield according to the general procedure.  $^1\text{H}$  NMR ( $\text{CDCl}_3$ , 500 MHz, ppm):  $\delta$  7.66 (d,  $J$  = 8.3 Hz, 2H), 7.24 (d,  $J$  = 8.0 Hz, 2H), 7.05 (d,  $J$  = 8.2 Hz, 2H), 6.97 (d,  $J$  = 8.4 Hz, 2H), 6.73 (s, 1H), 2.40 (s, 3H), 2.29 (s, 3H);  $^{13}\text{C}$  NMR ( $\text{CDCl}_3$ , 125 MHz, ppm):  $\delta$  143.7, 136.1, 135.4, 133.7, 129.8, 129.6, 127.3, 122.3, 21.5, 20.8; HRMS calc. for  $\text{C}_{14}\text{H}_{15}\text{NO}_2\text{SNa}$  ( $\text{M}+\text{Na}$ ) $^+$ , 284.0721; found, 284.0723.

## 5. Copies of NMR spectra for 3a-3x

3a

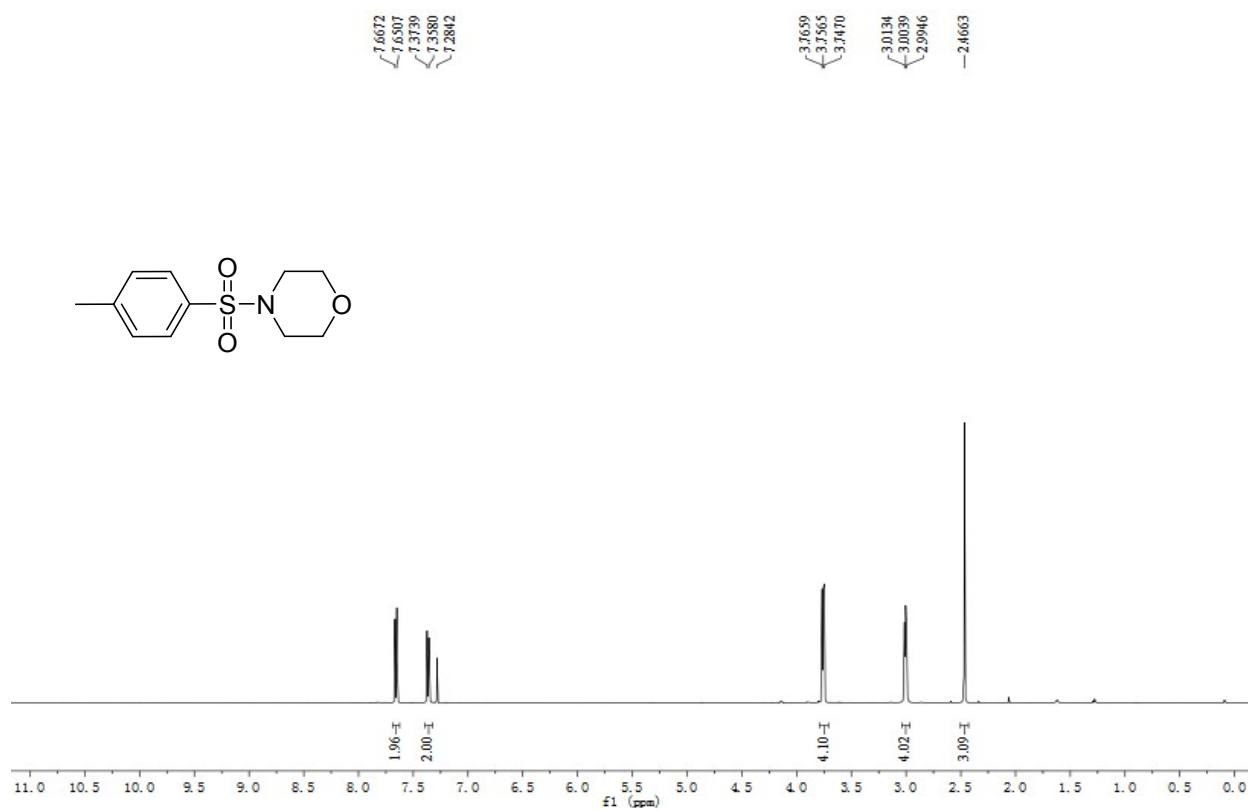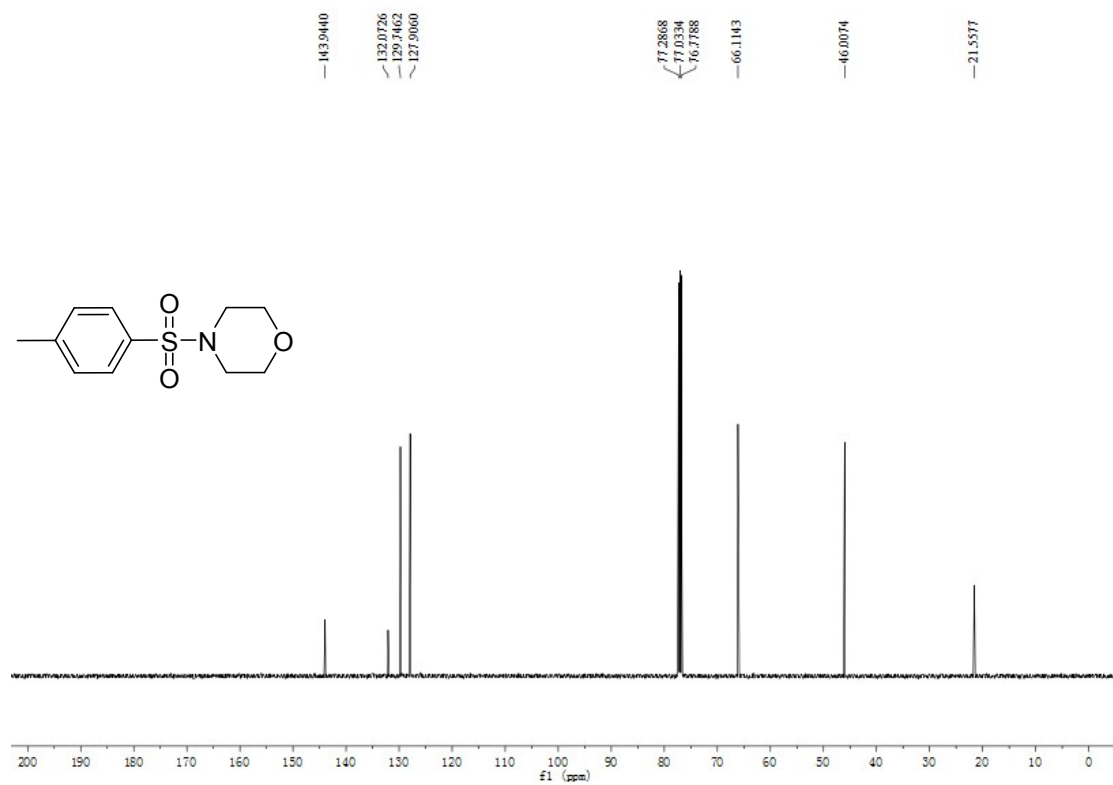

3b

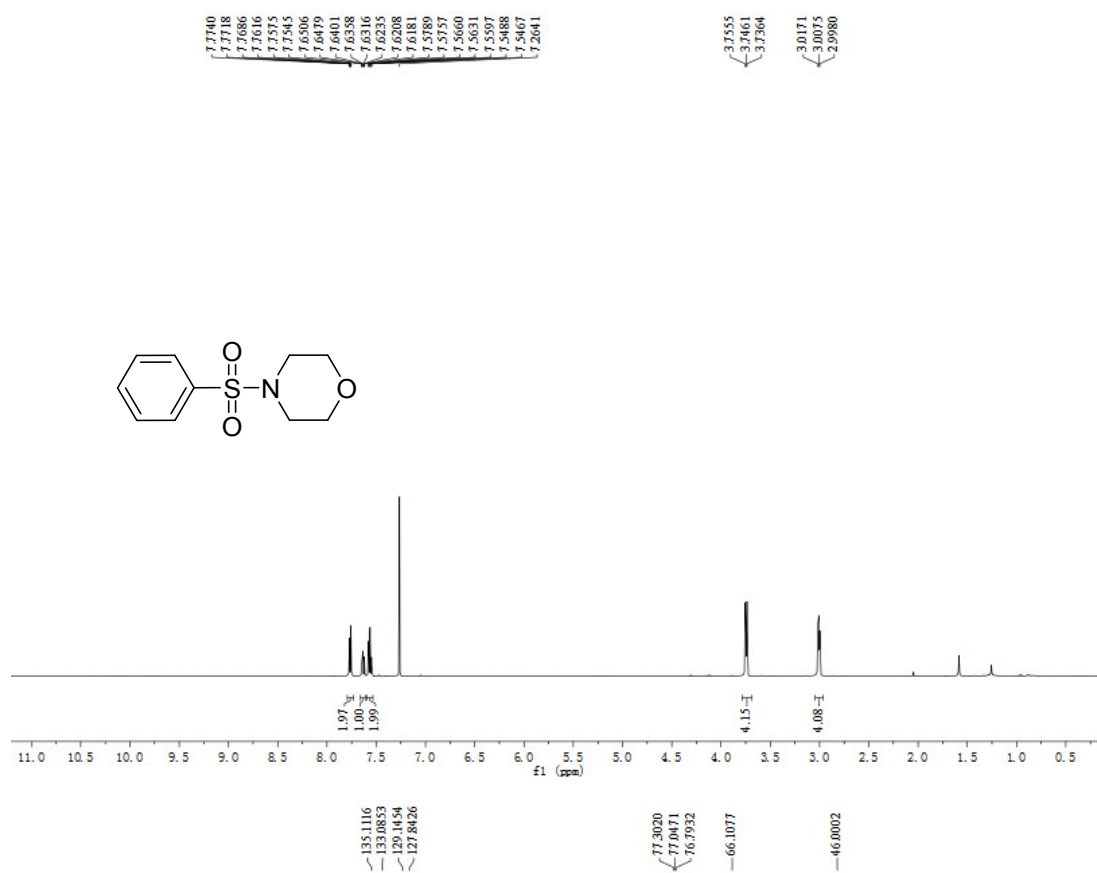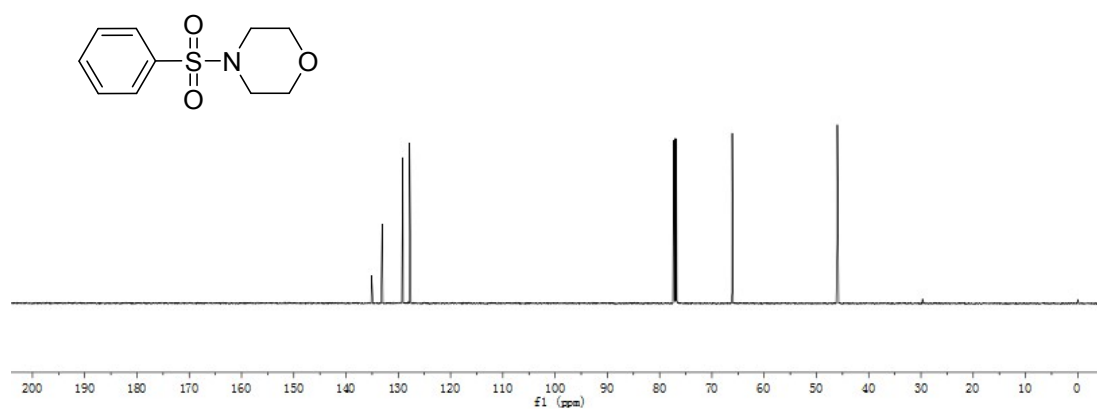

3c

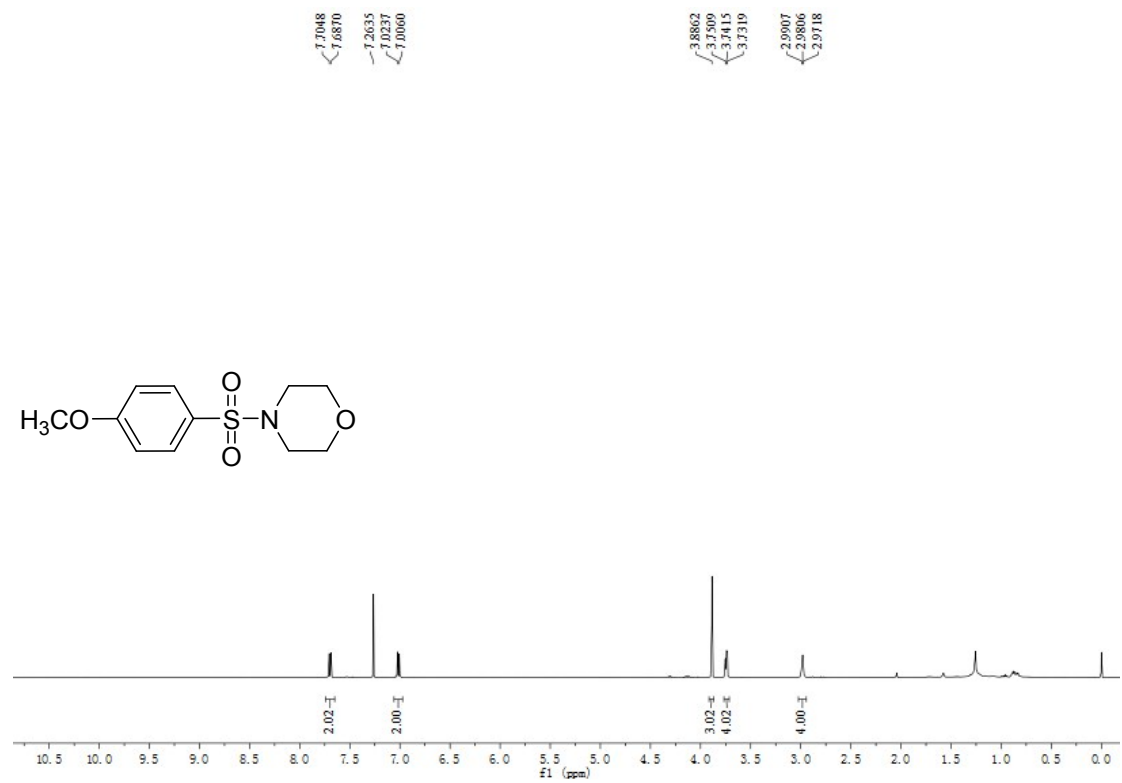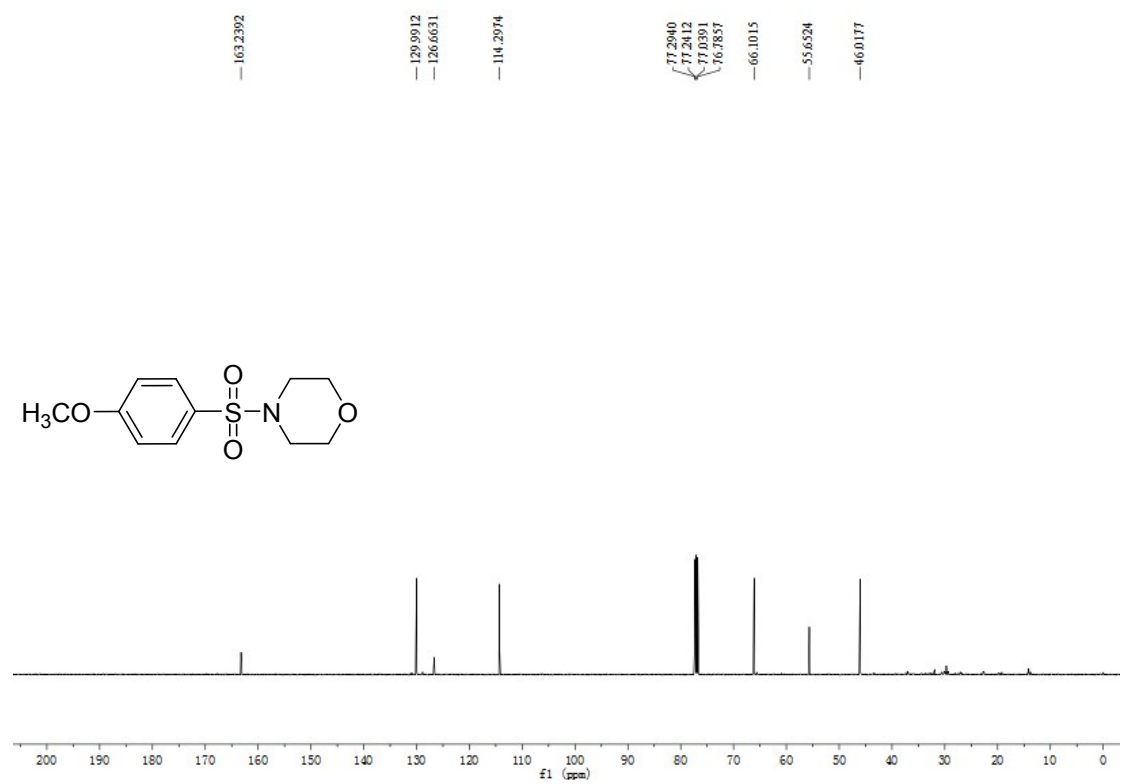

**3d**

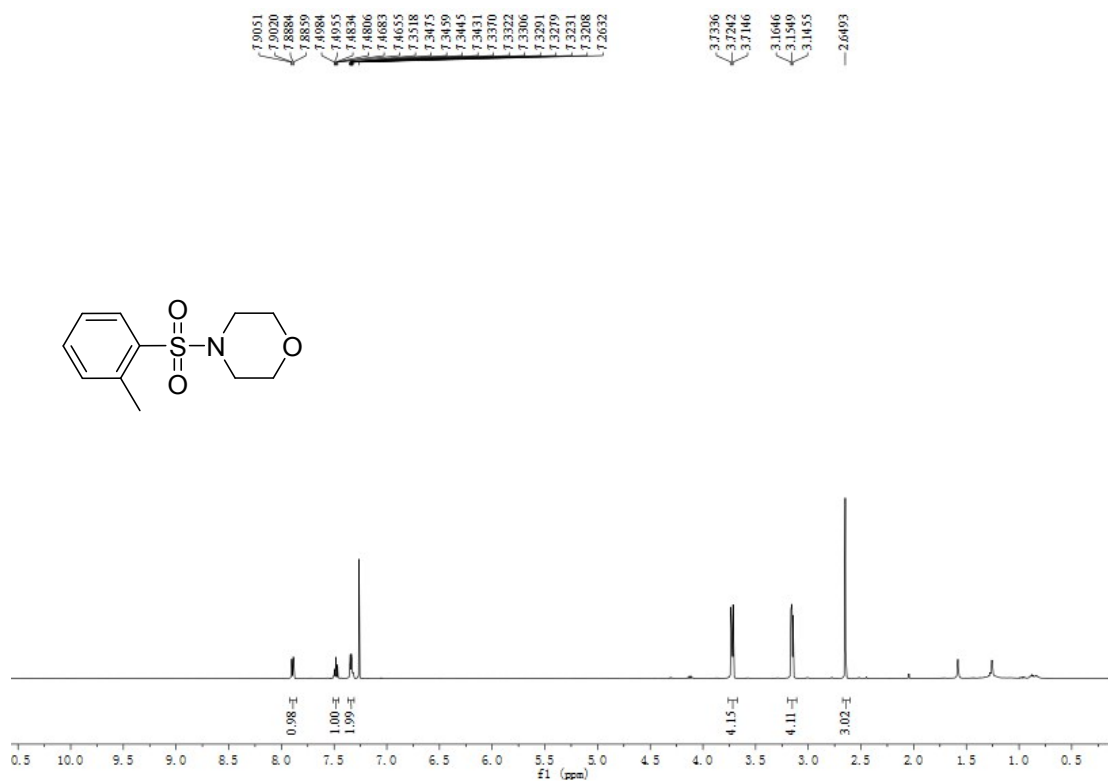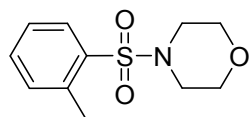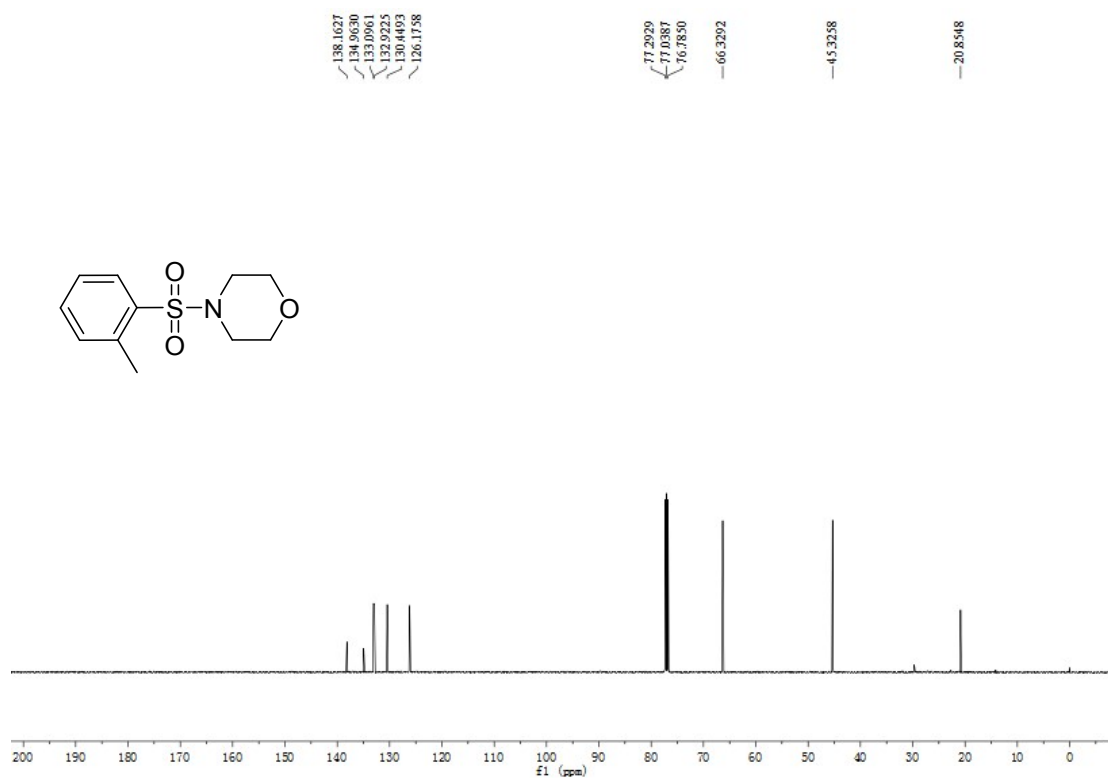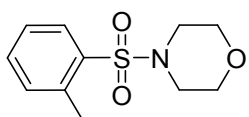

3e

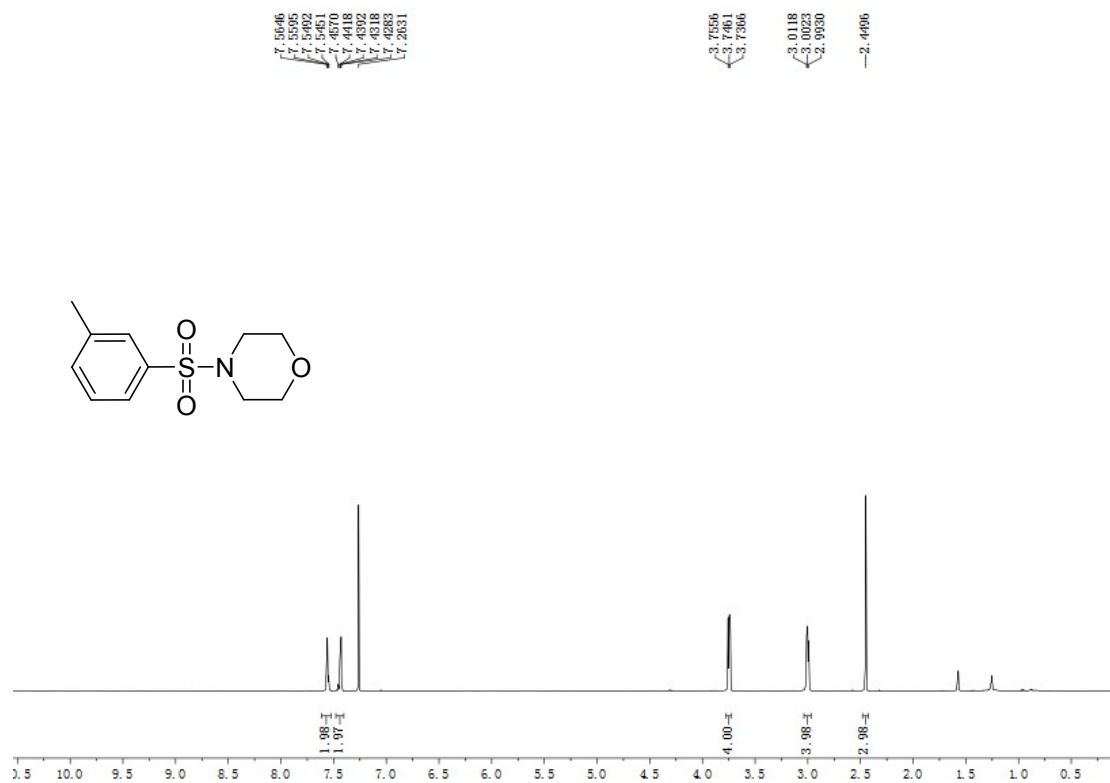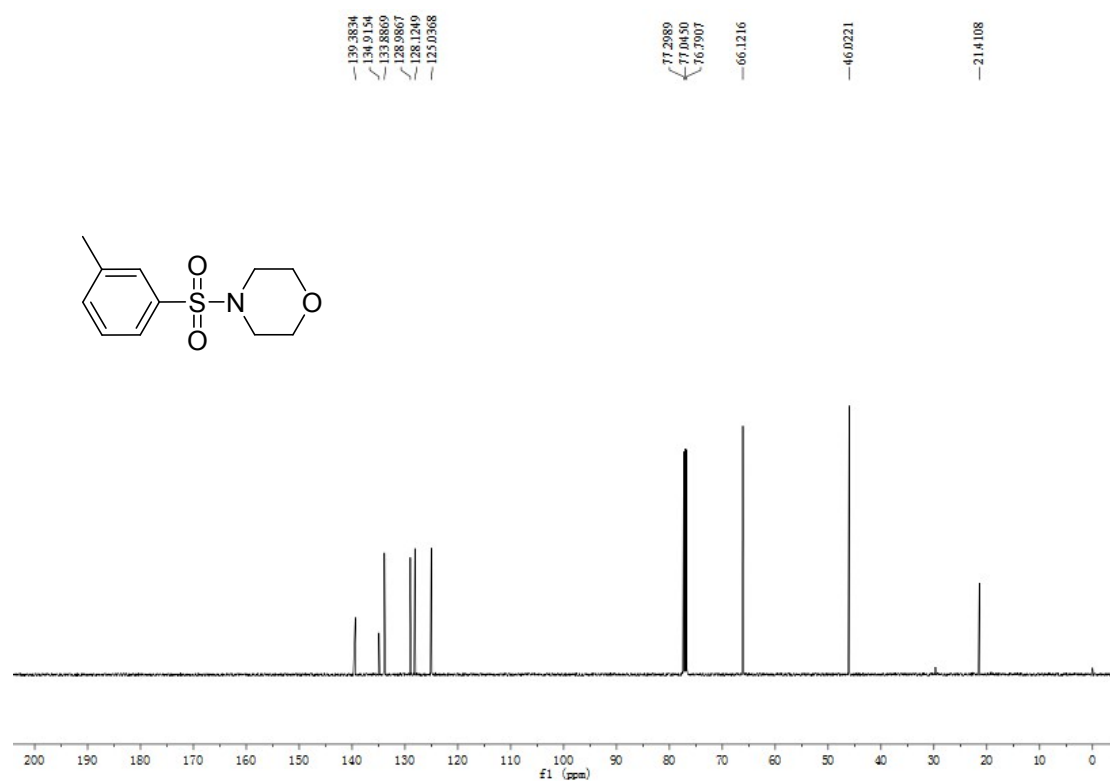

3f

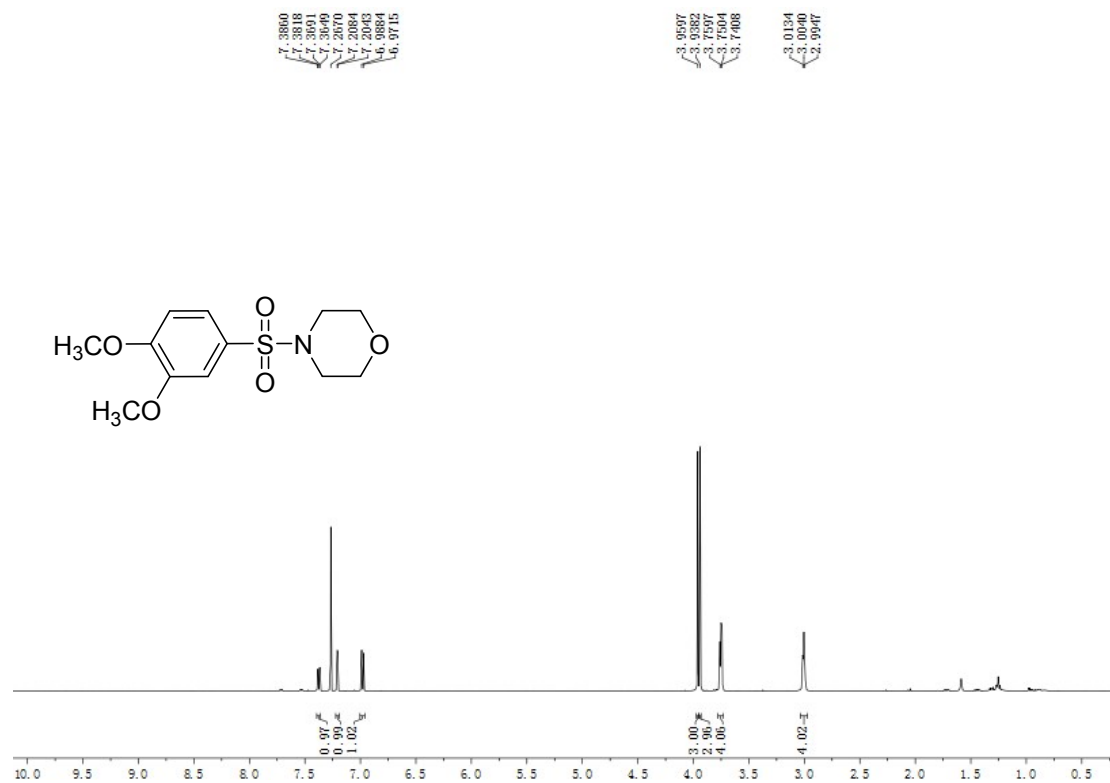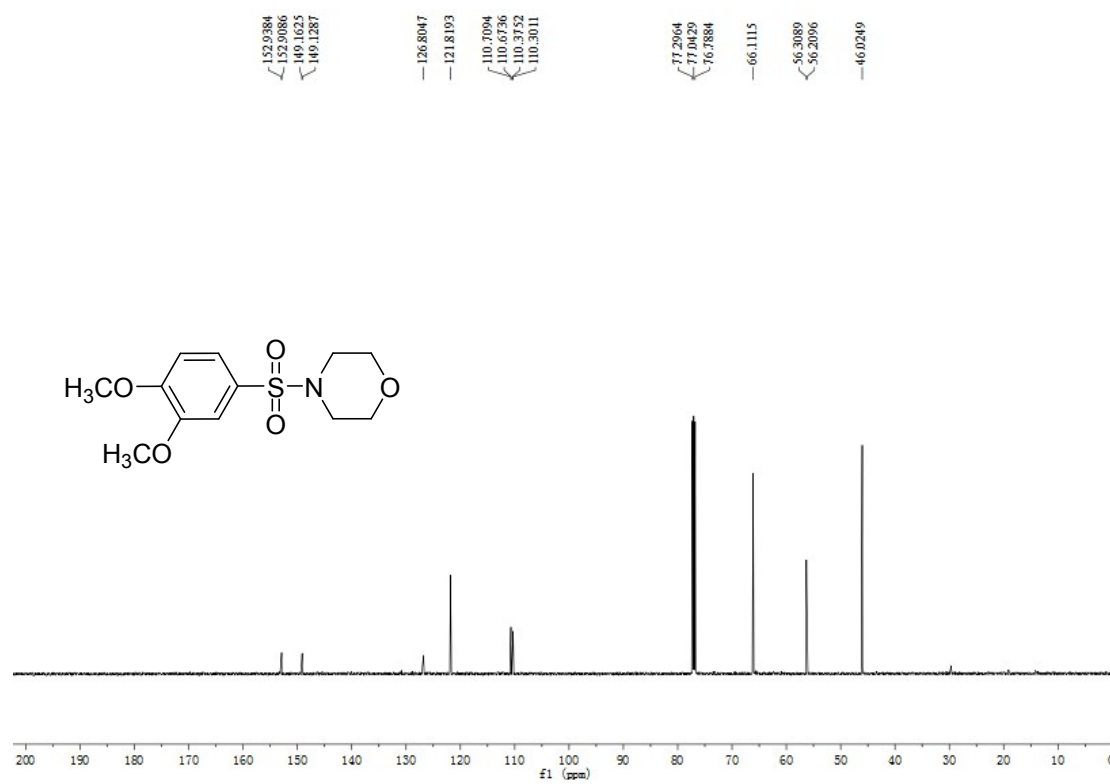



3g

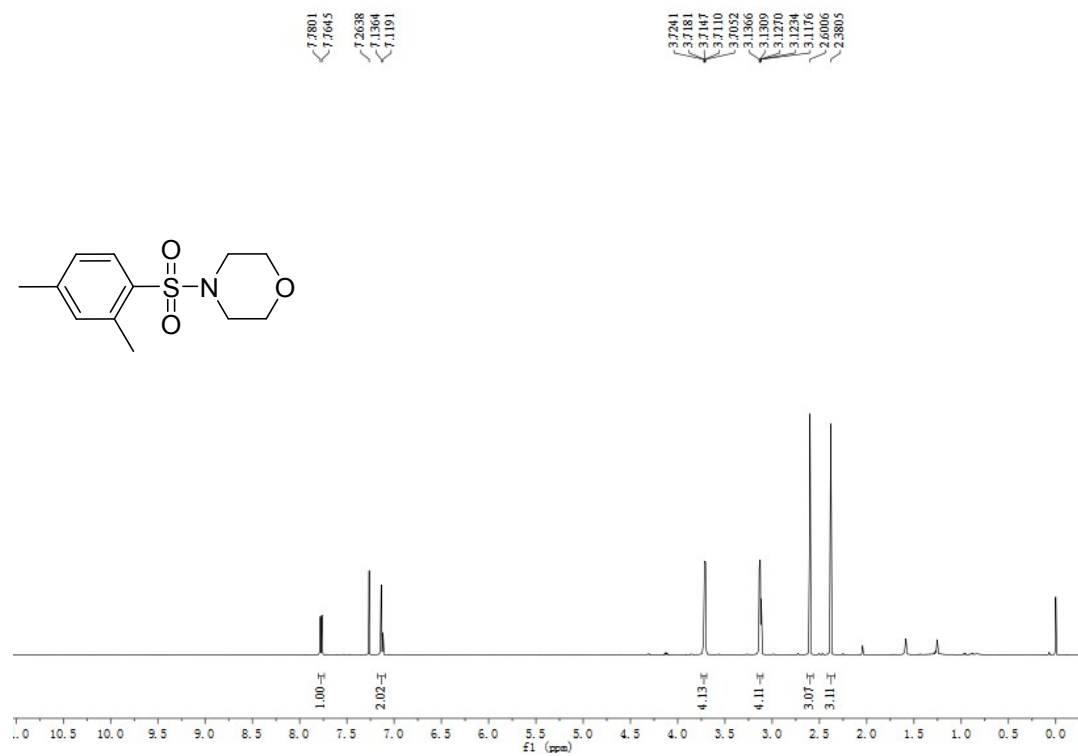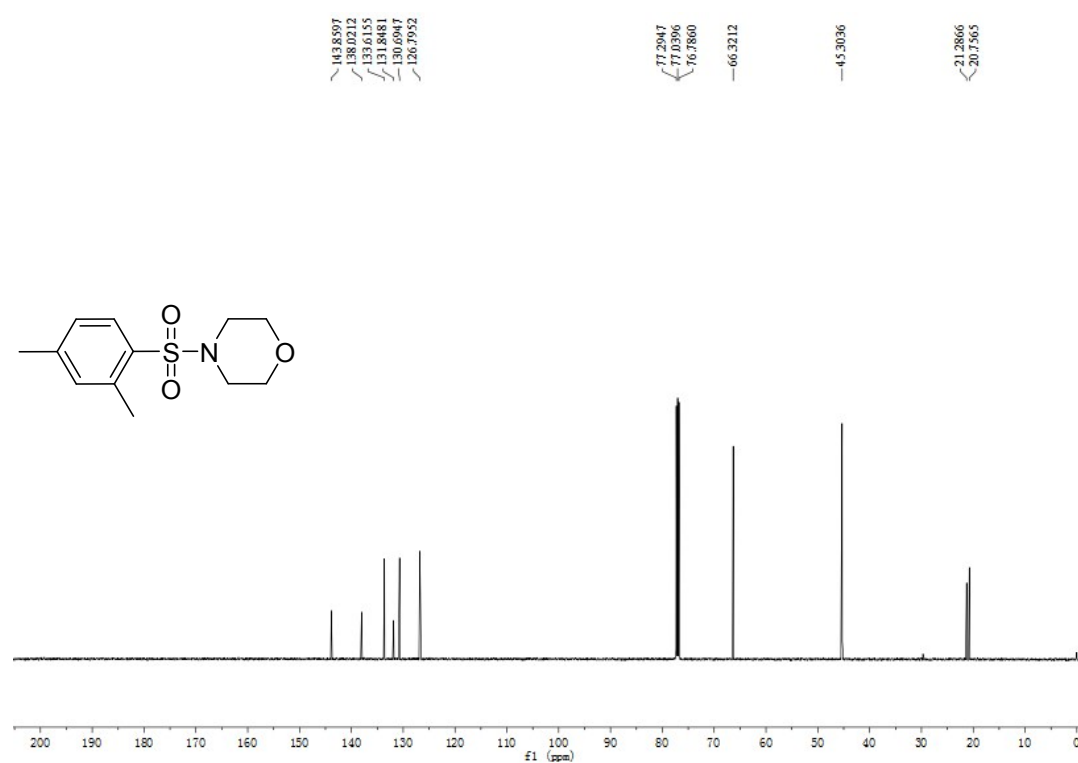

3h

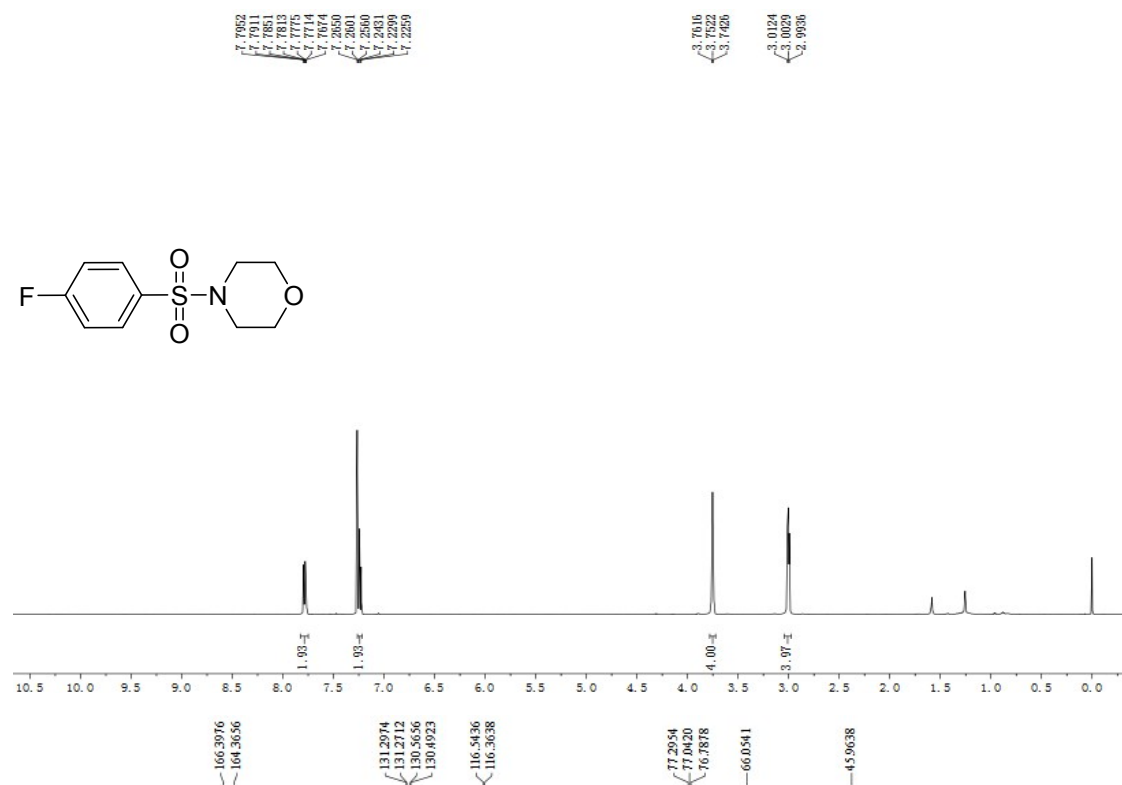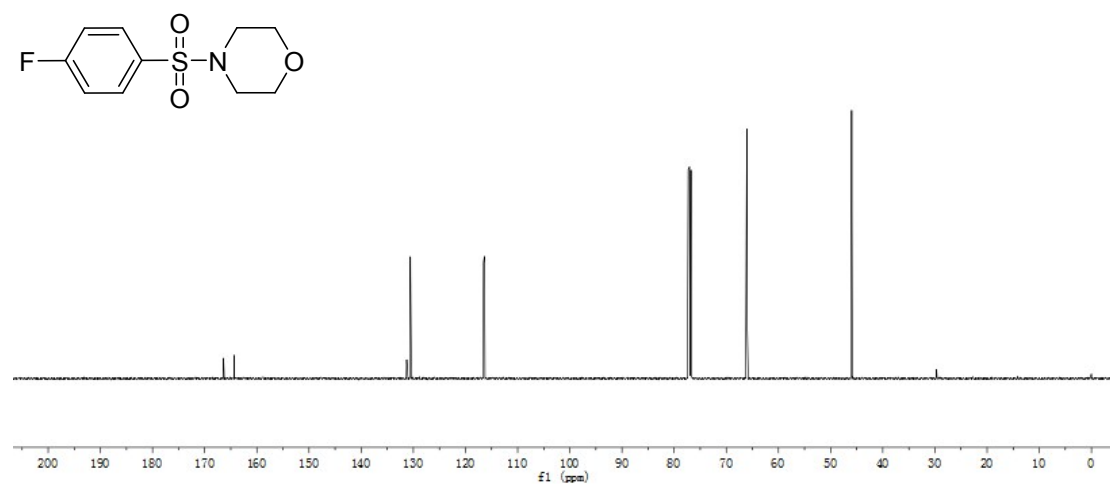

3i

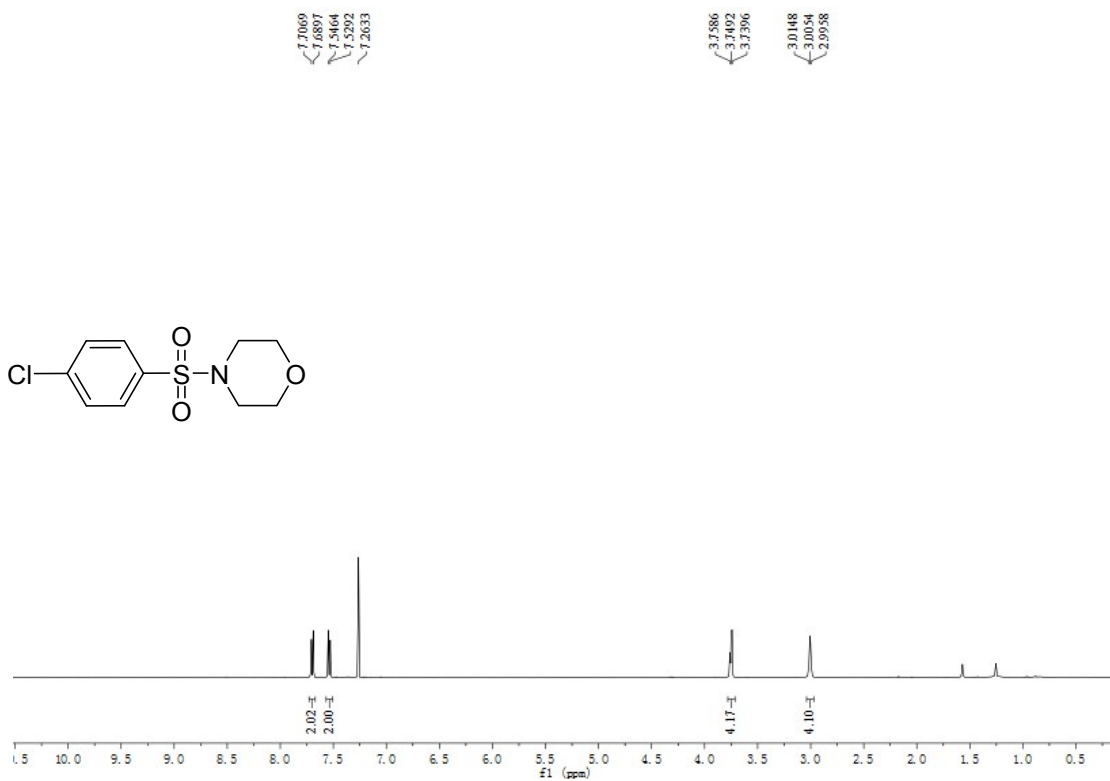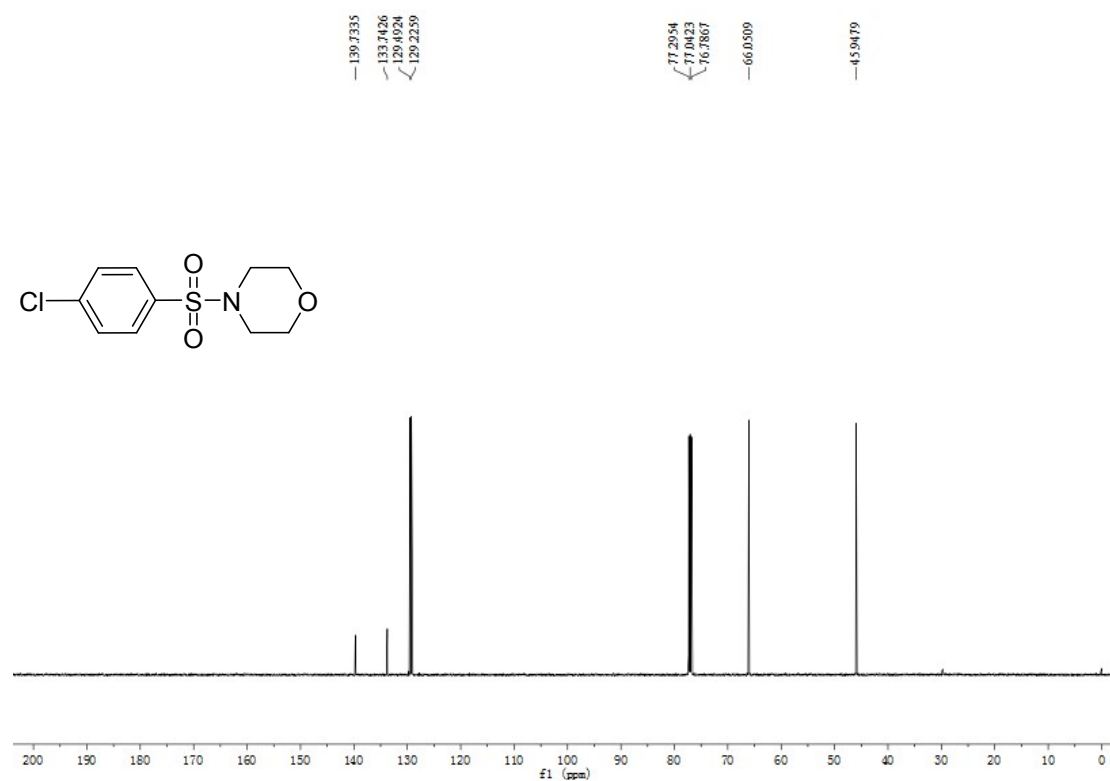

3j

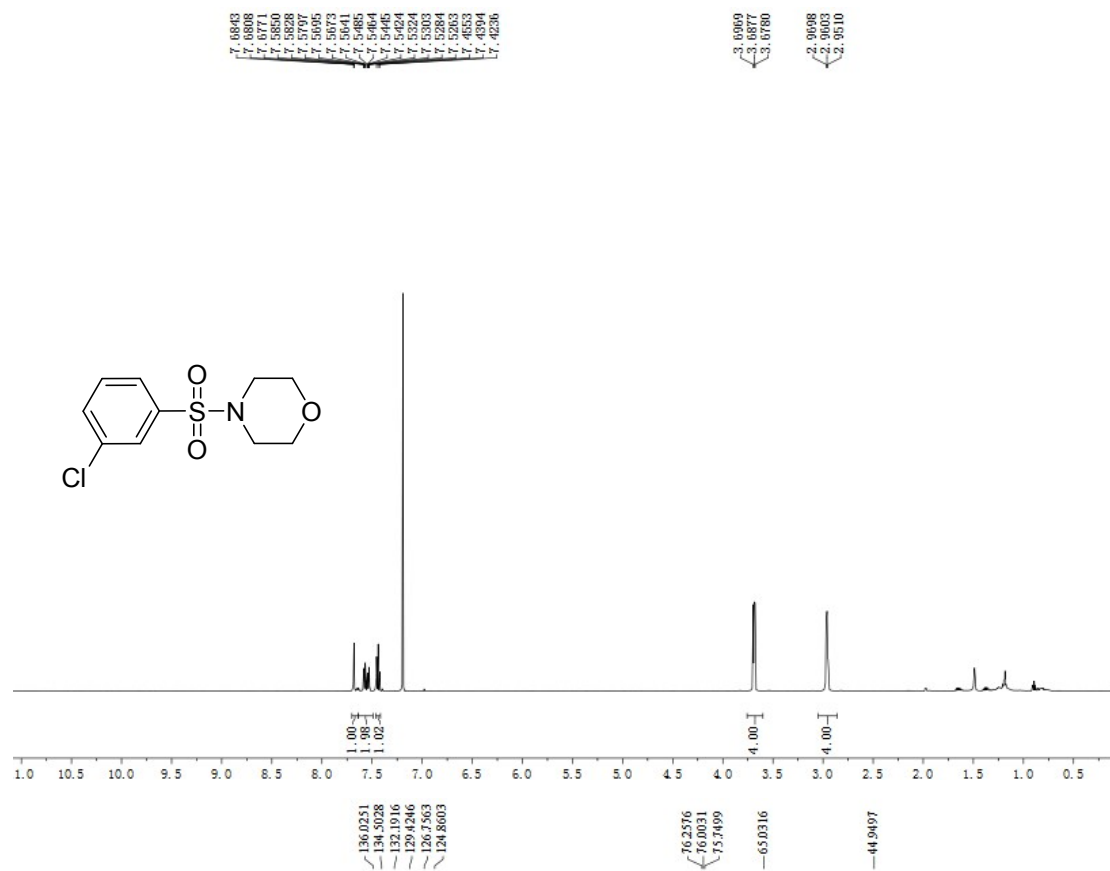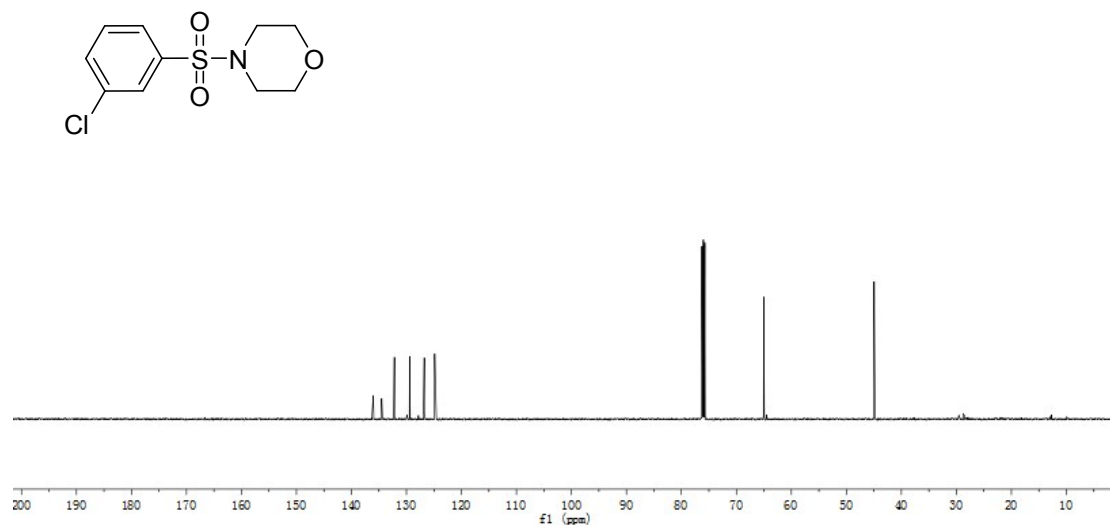

3k

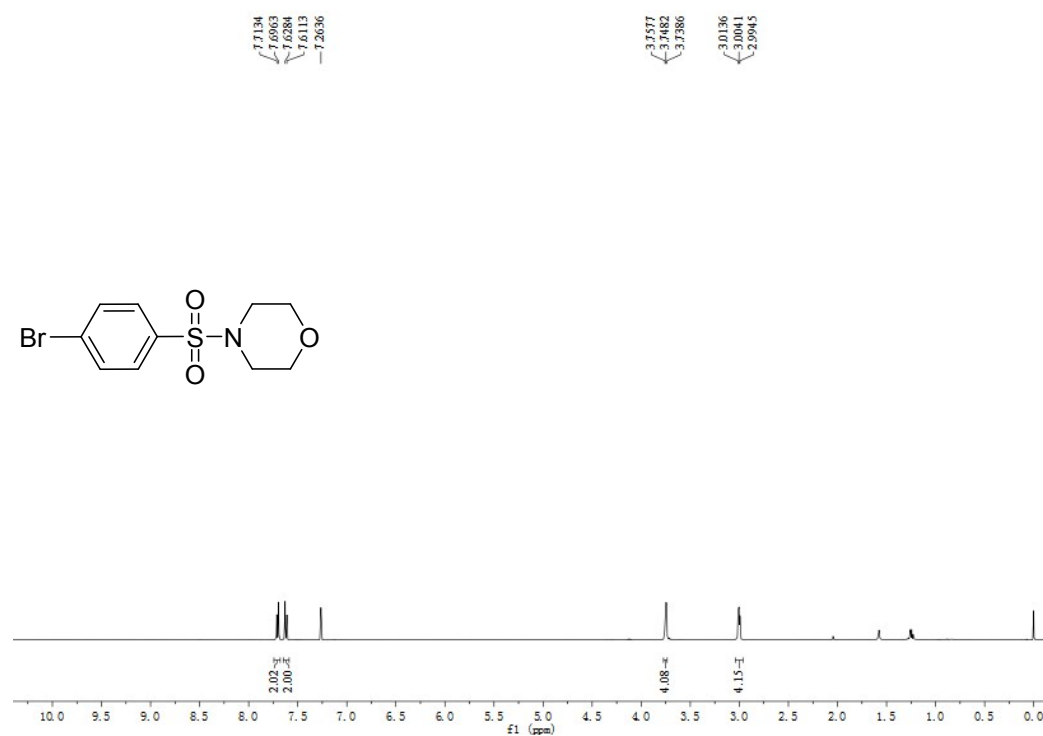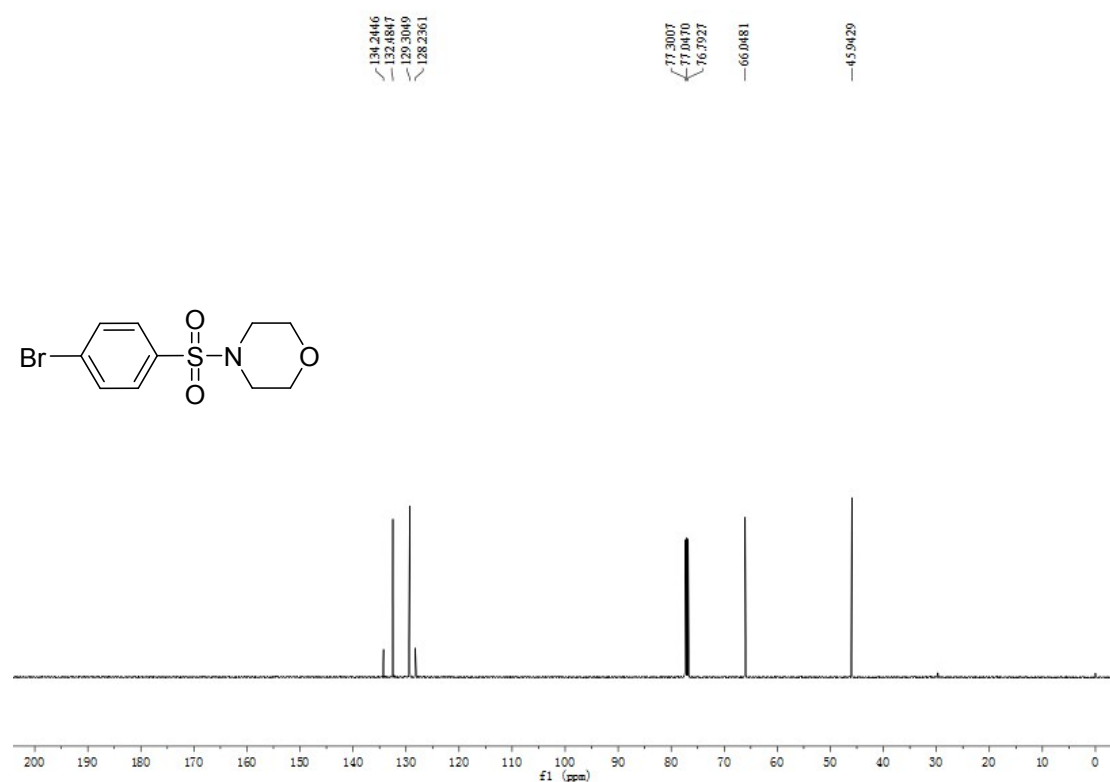

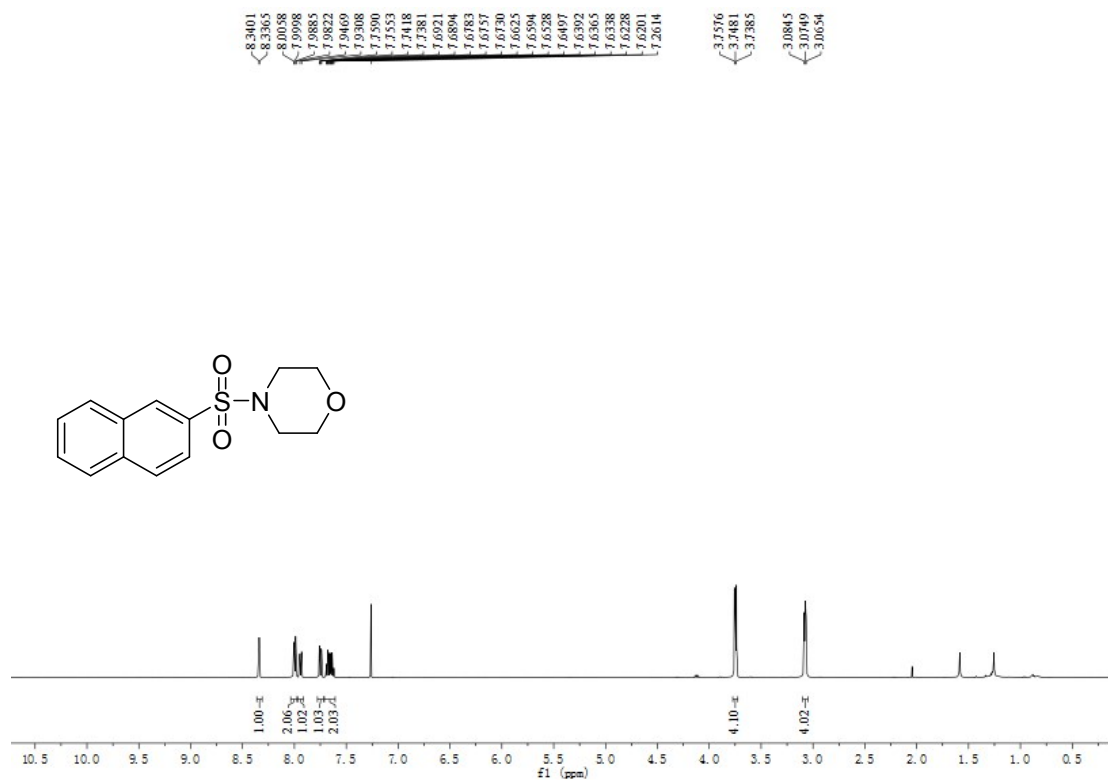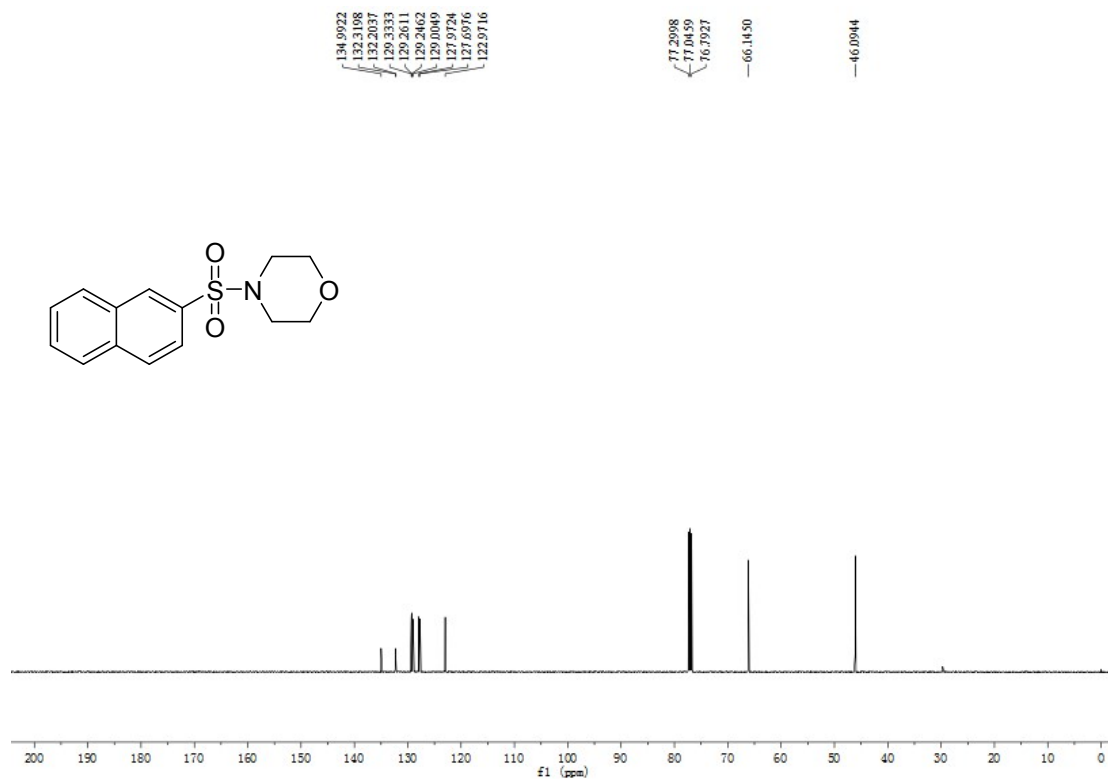

3m

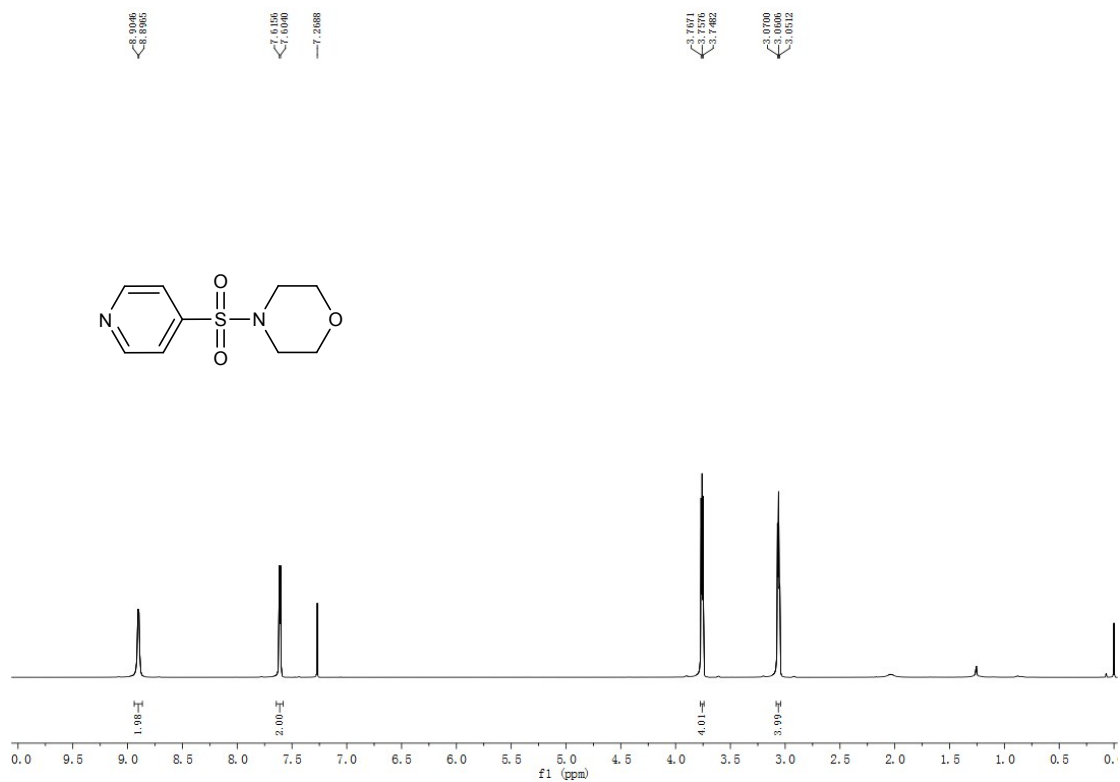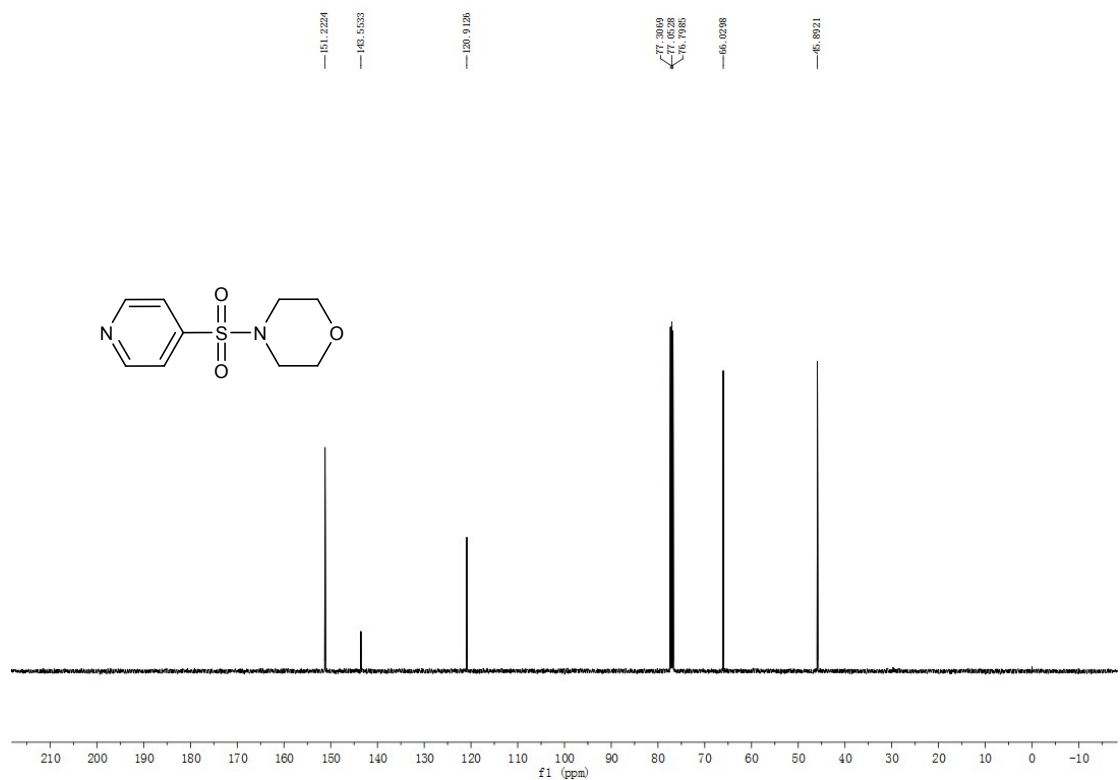

3n

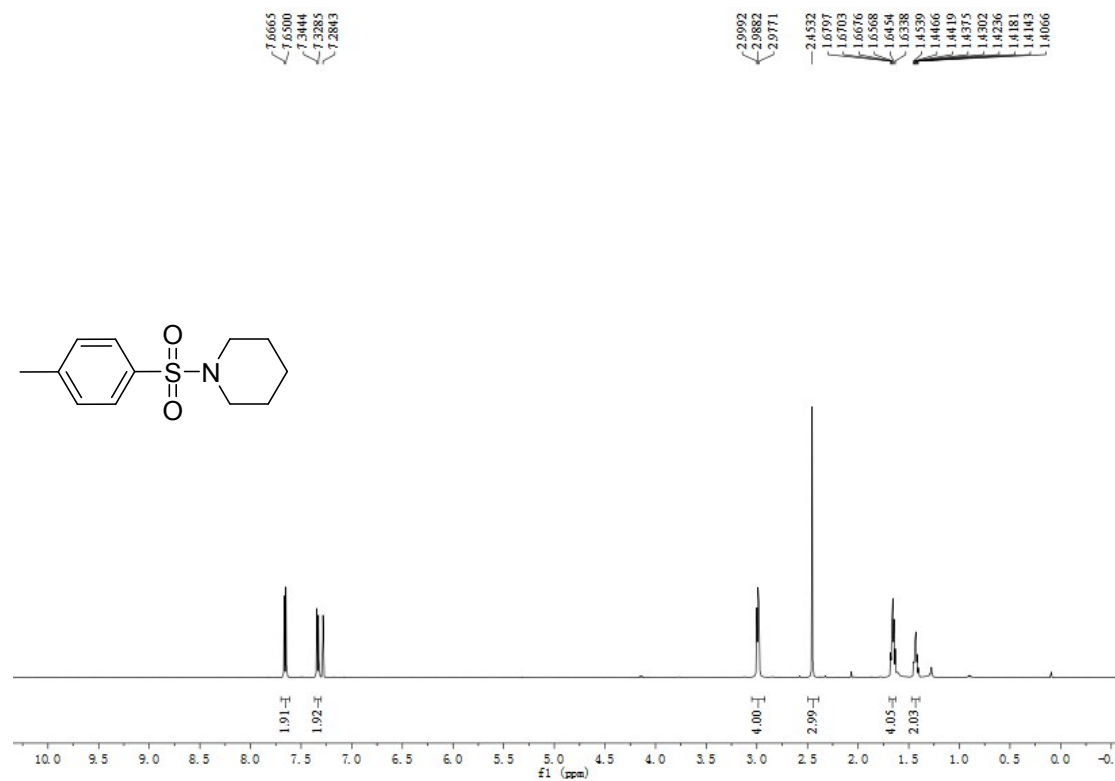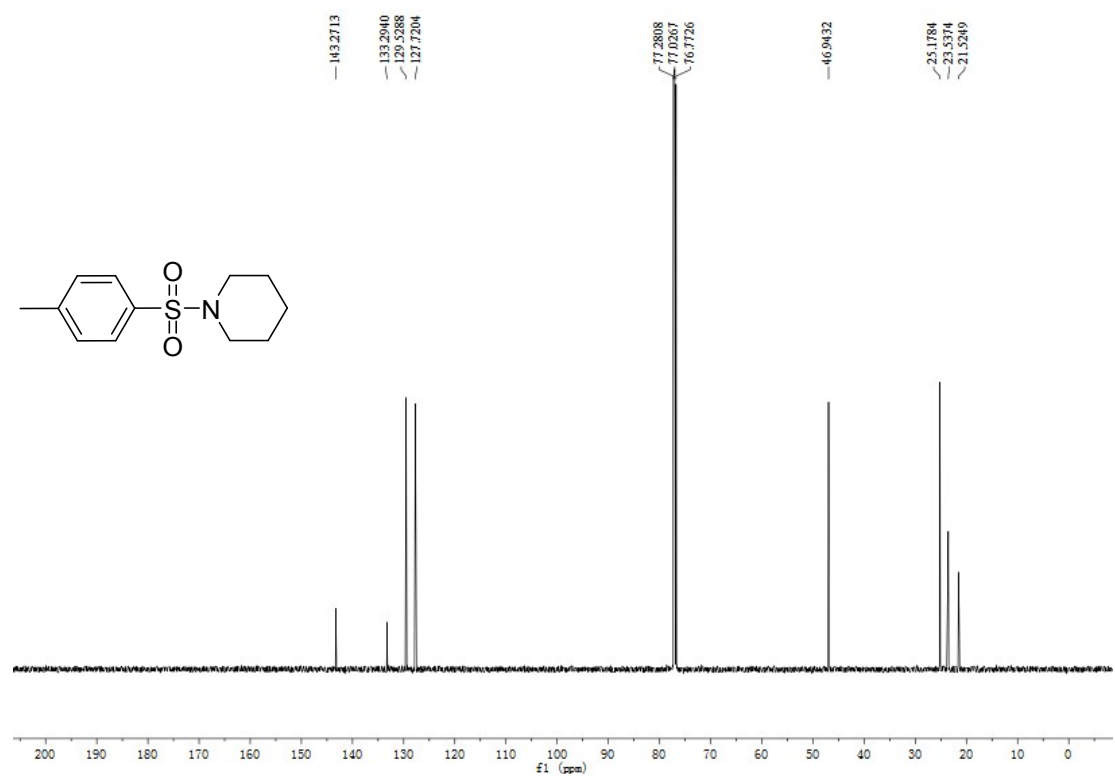



30

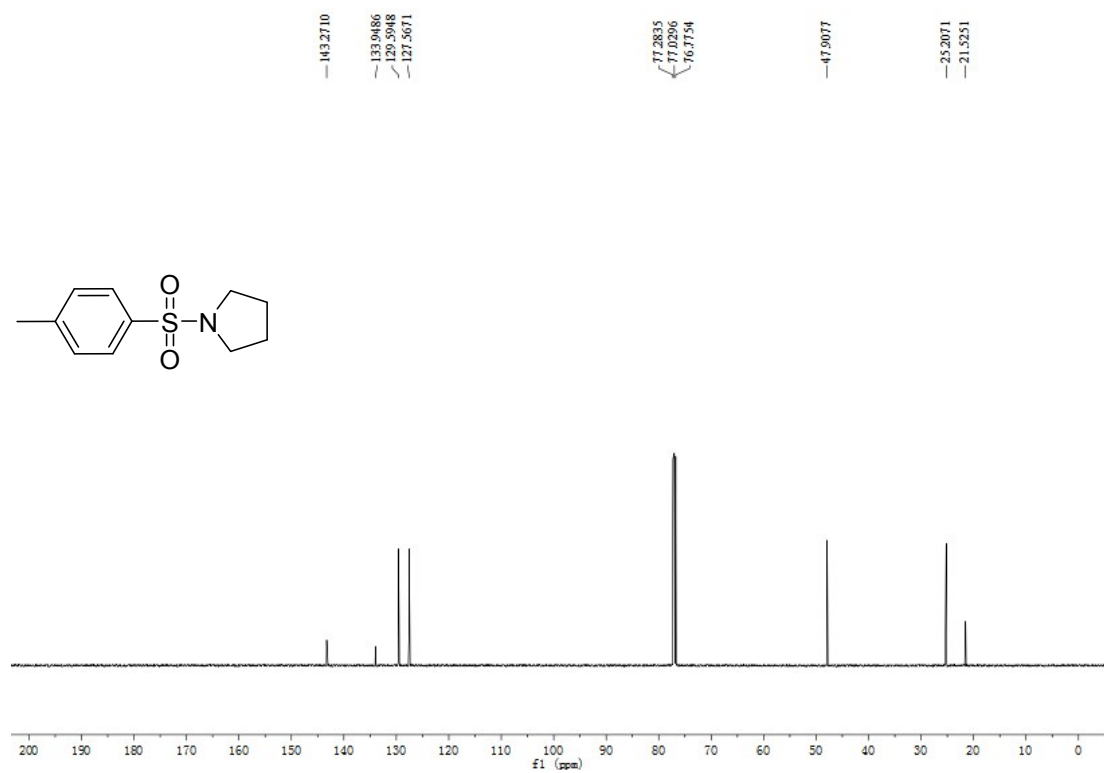

3p

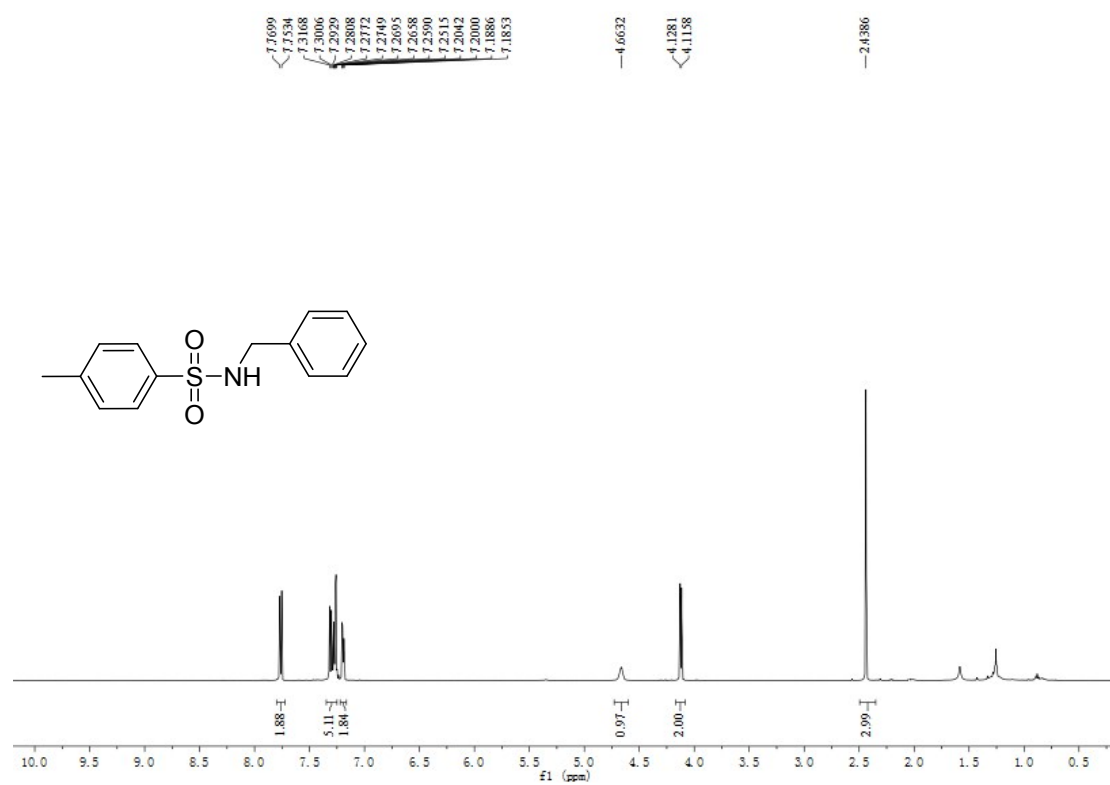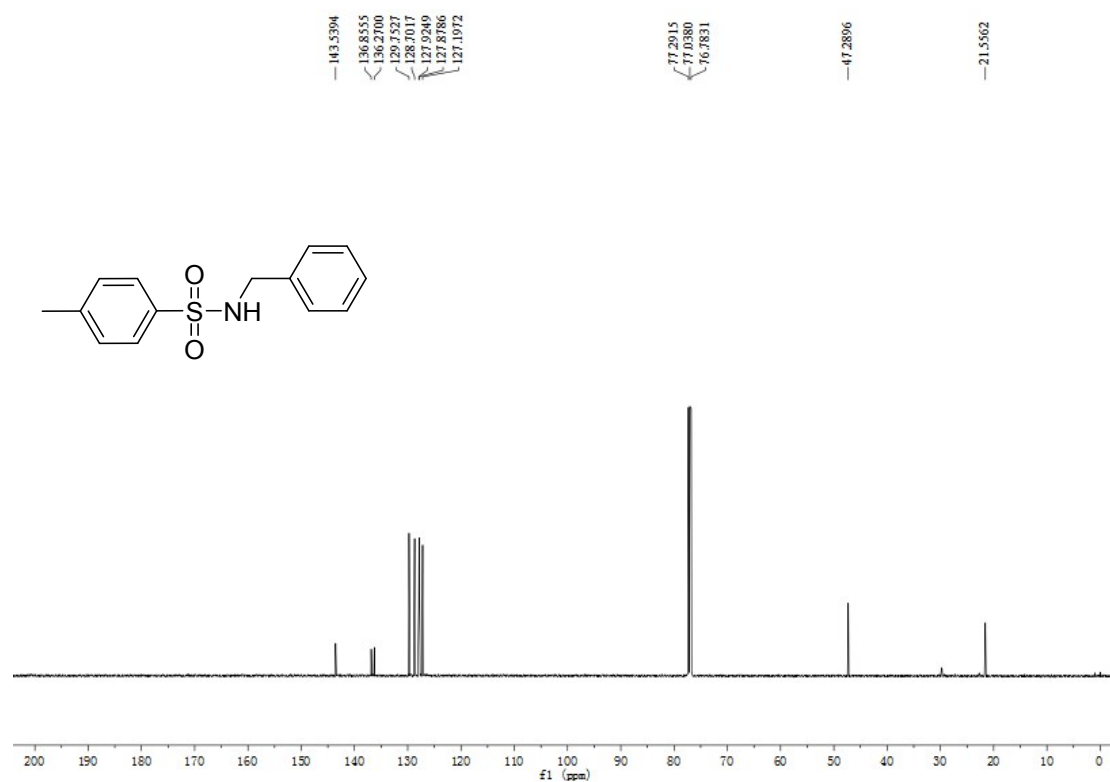

3q

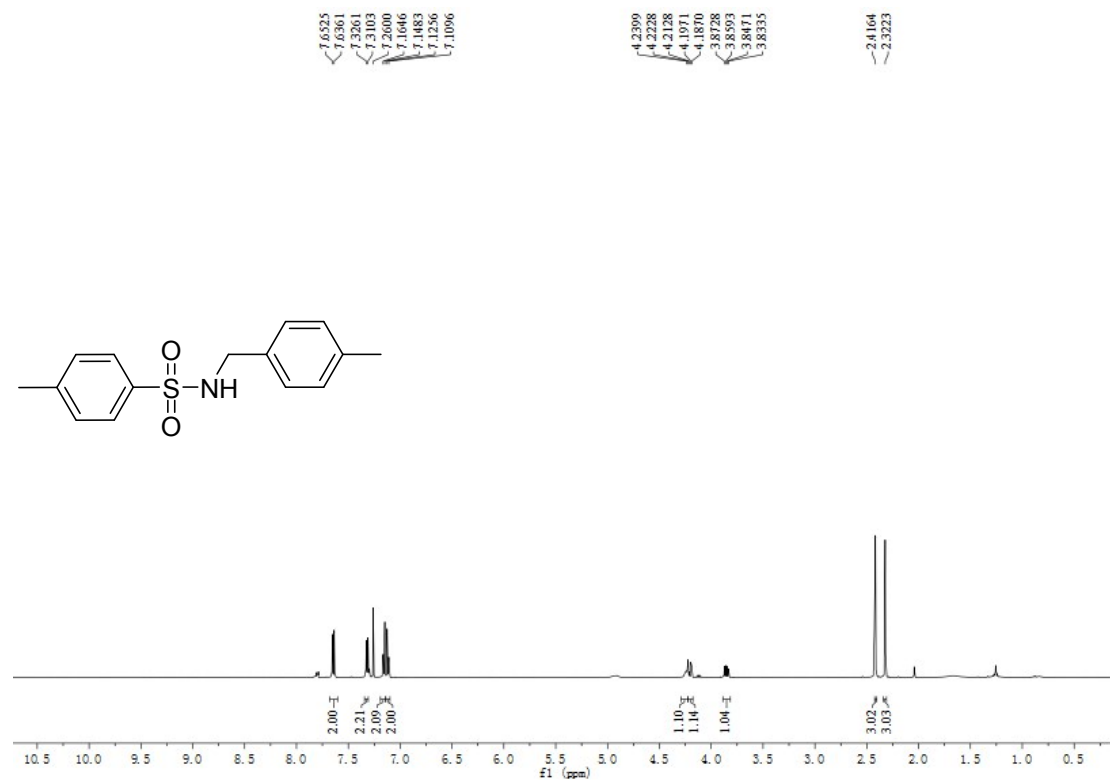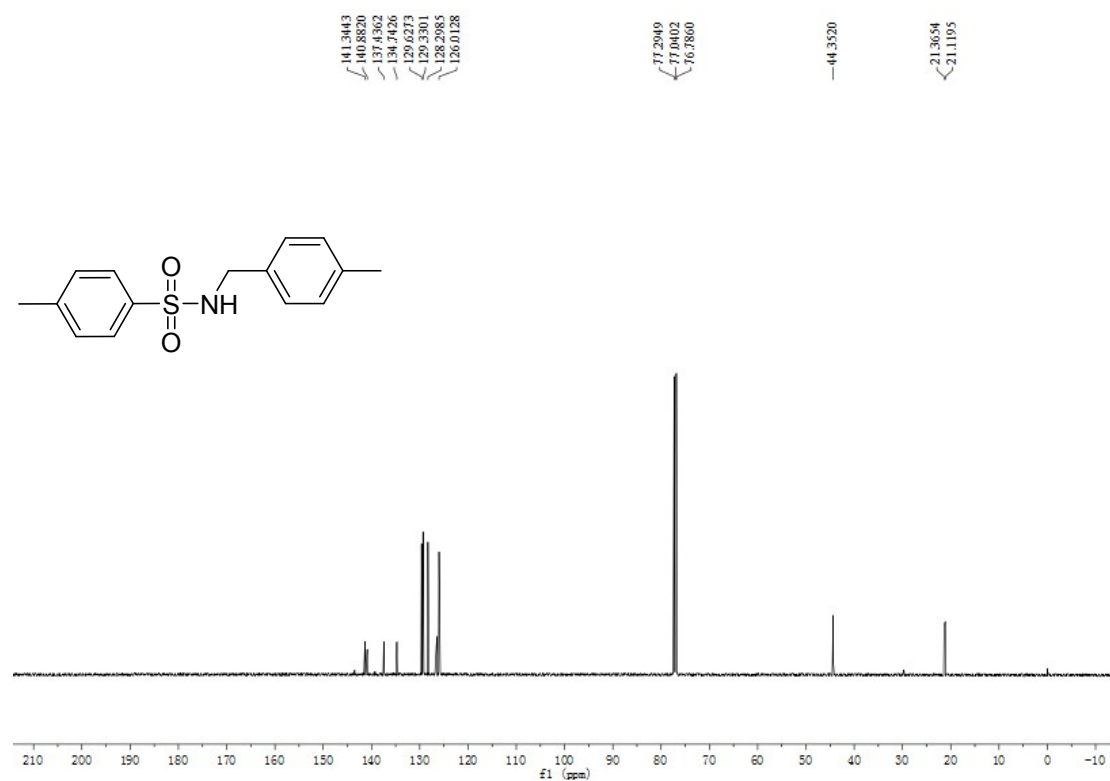

3r

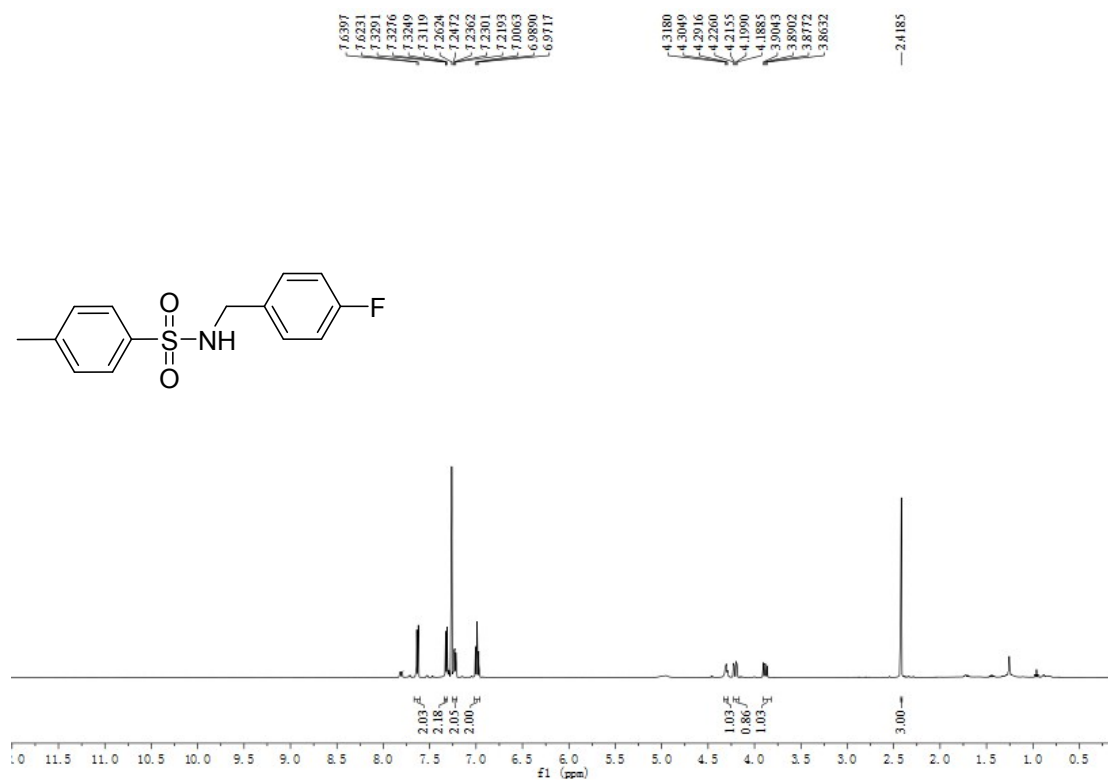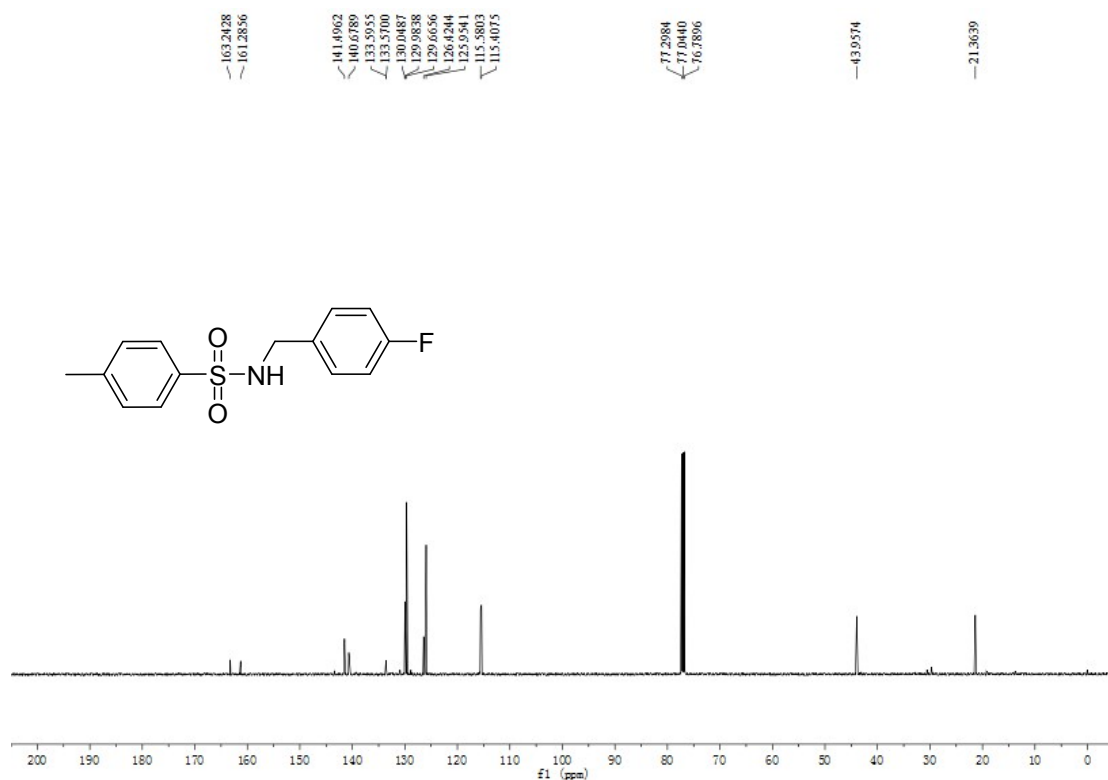

3s

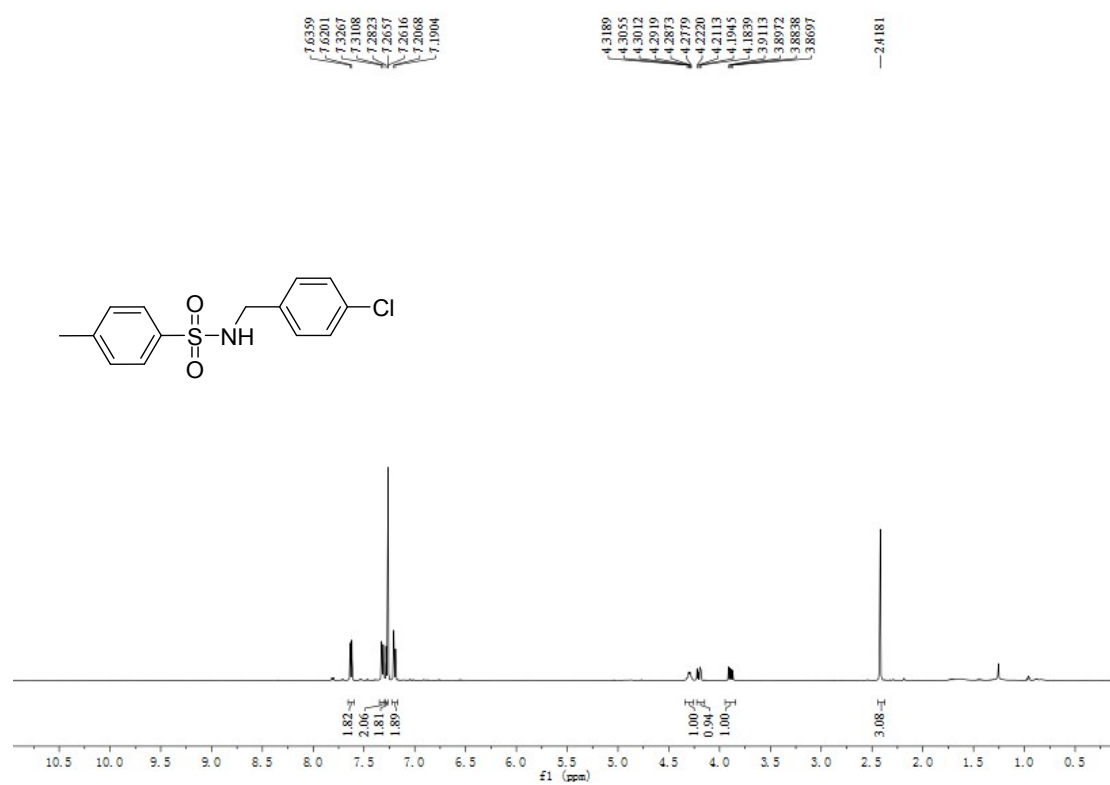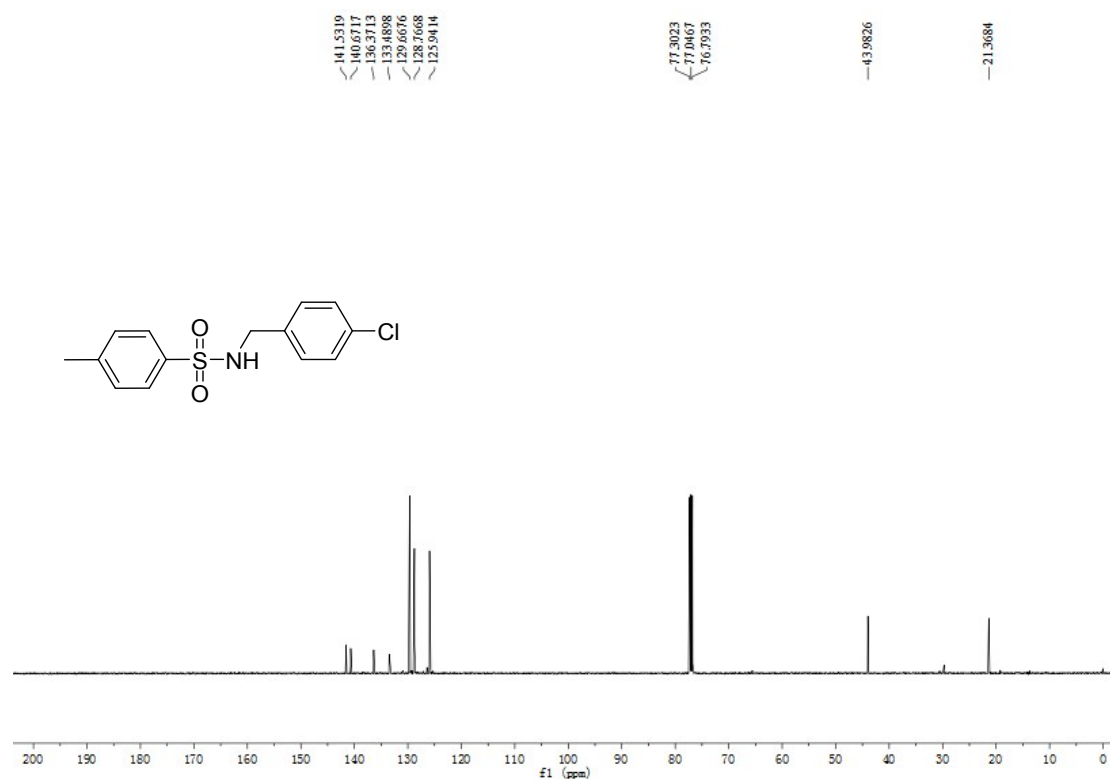

CC1=CC=C(C=C1)S(=O)(=O)NC2=CC=C(C=C2)Br

<sup>1</sup>H NMR spectrum (DMSO-d<sub>6</sub>) of 4-bromobenzenesulfonamide. The spectrum shows aromatic signals between 7.1 and 7.6 ppm, a methylene singlet at 4.3 ppm, and a methyl singlet at 2.4 ppm. Integration values are provided for the aromatic region (1.92, 1.90, 2.01, 2.00) and the aliphatic region (0.98, 1.01, 1.00, 3.05).

| Chemical Shift (ppm)                                                                   | Integration      |
|----------------------------------------------------------------------------------------|------------------|
| 7.5312, 7.6147, 7.4345, 7.4177                                                         | 1.92             |
| 7.3258, 7.3239, 7.3087                                                                 | 1.90             |
| 7.3073                                                                                 | 2.01             |
| 7.2619, 7.1474, 7.1306                                                                 | 2.00             |
| 4.3196, 4.3073, 4.2946, 4.2028, 4.1922, 4.1752, 4.1646, 3.8594, 3.8818, 3.8678, 3.8537 | 0.98, 1.01, 1.00 |
| 2.4175                                                                                 | 3.05             |

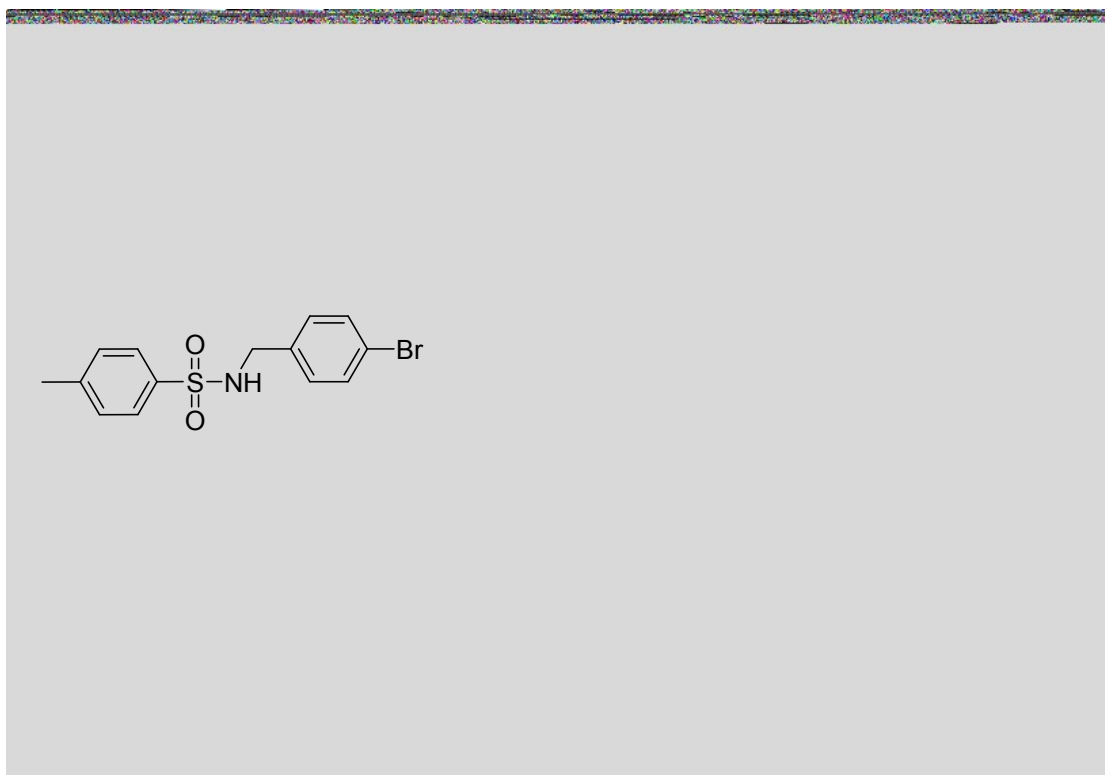

3u

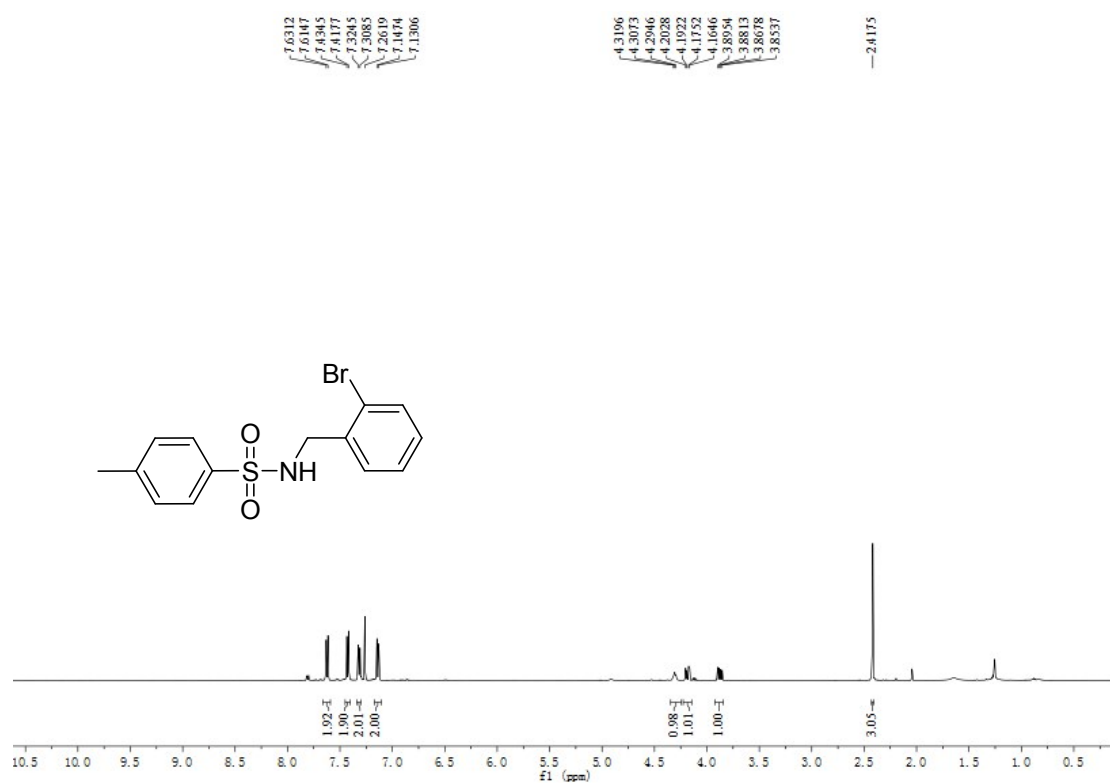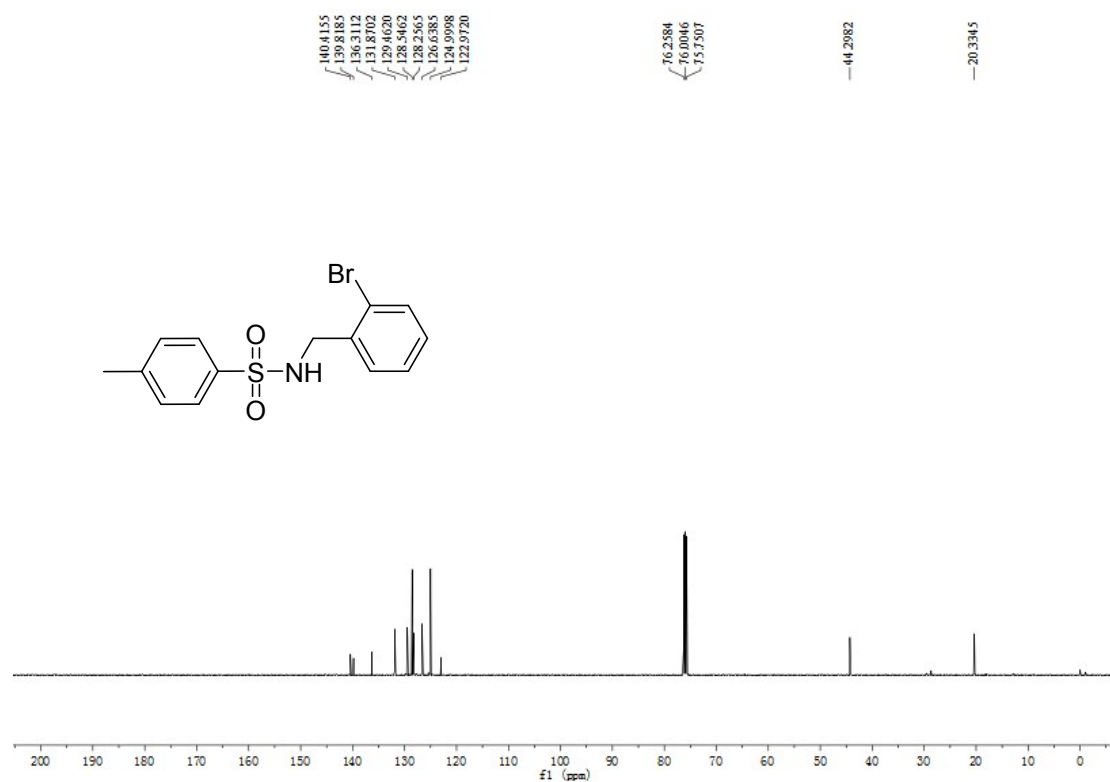

3v

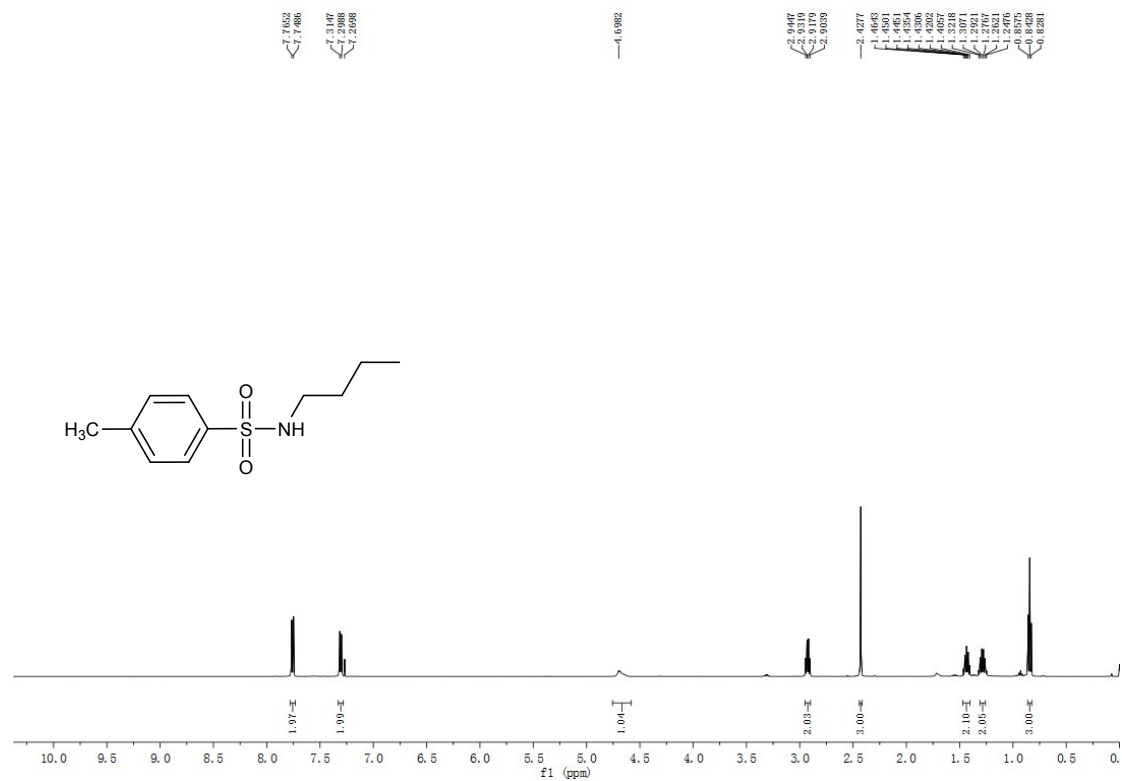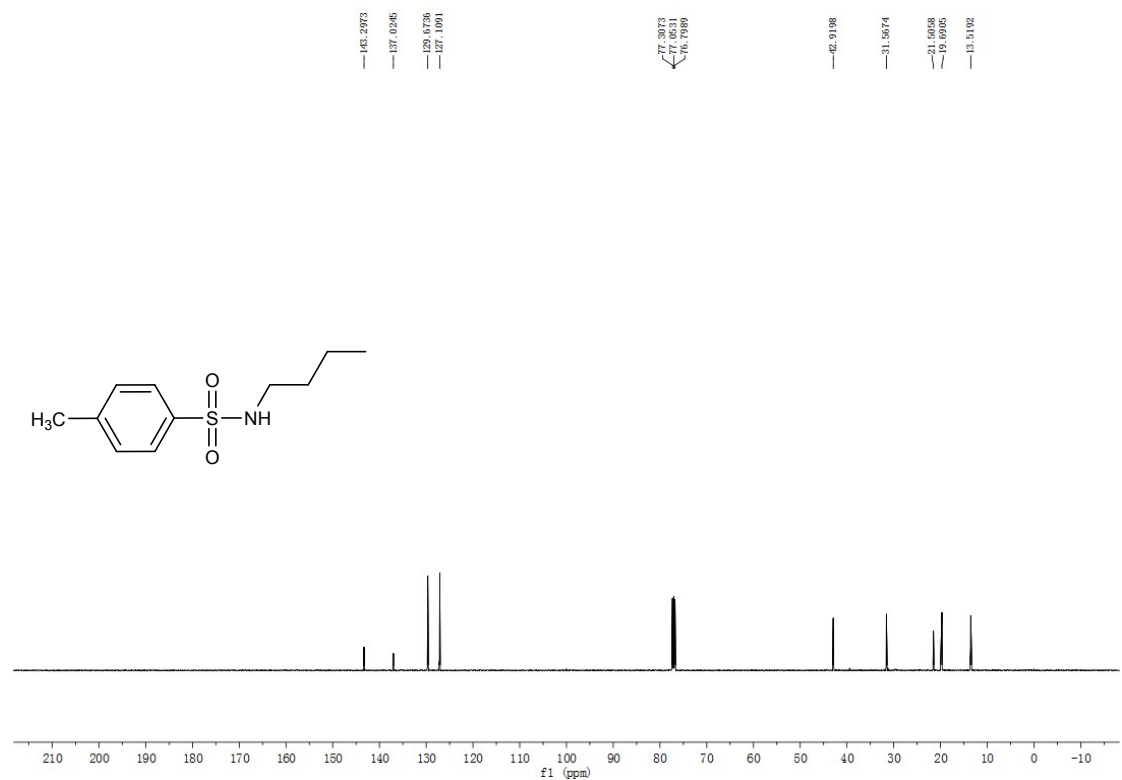



3w

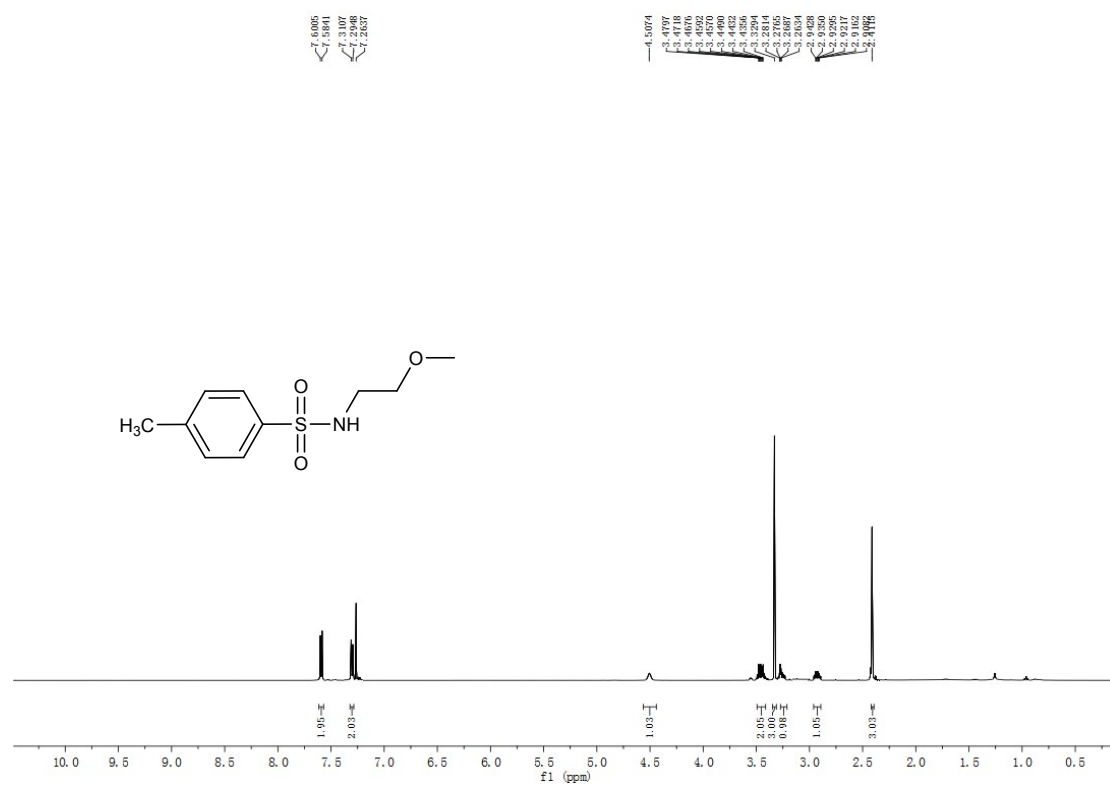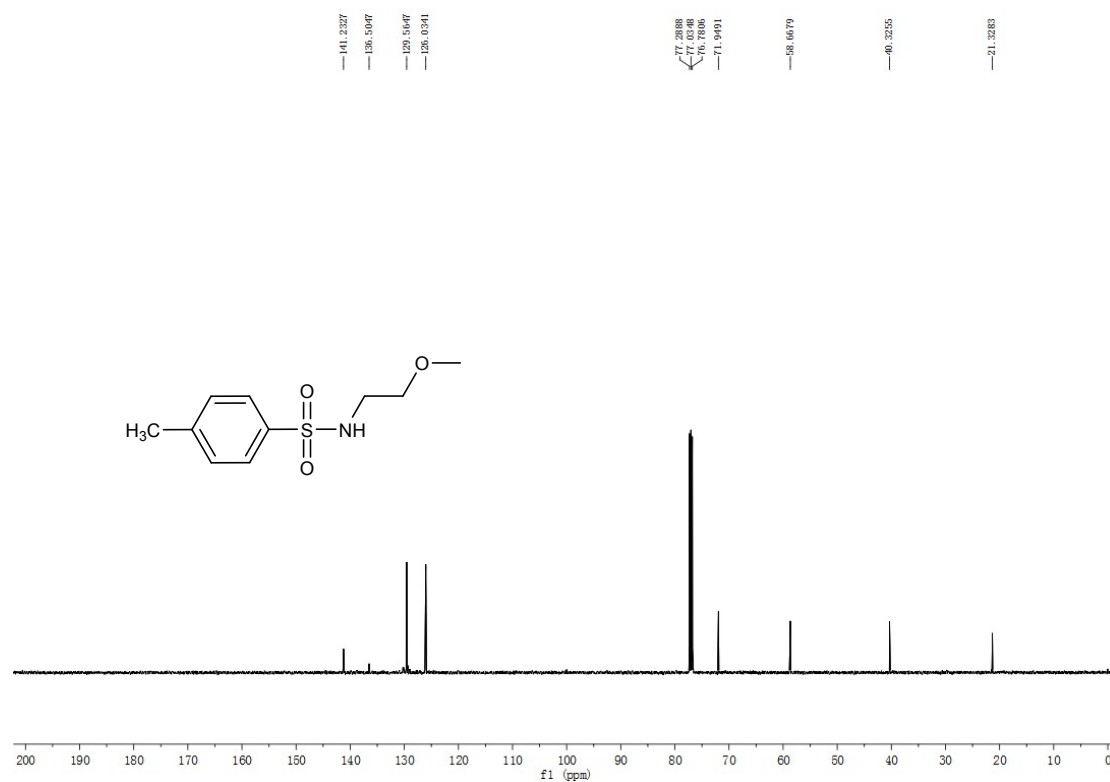

3x

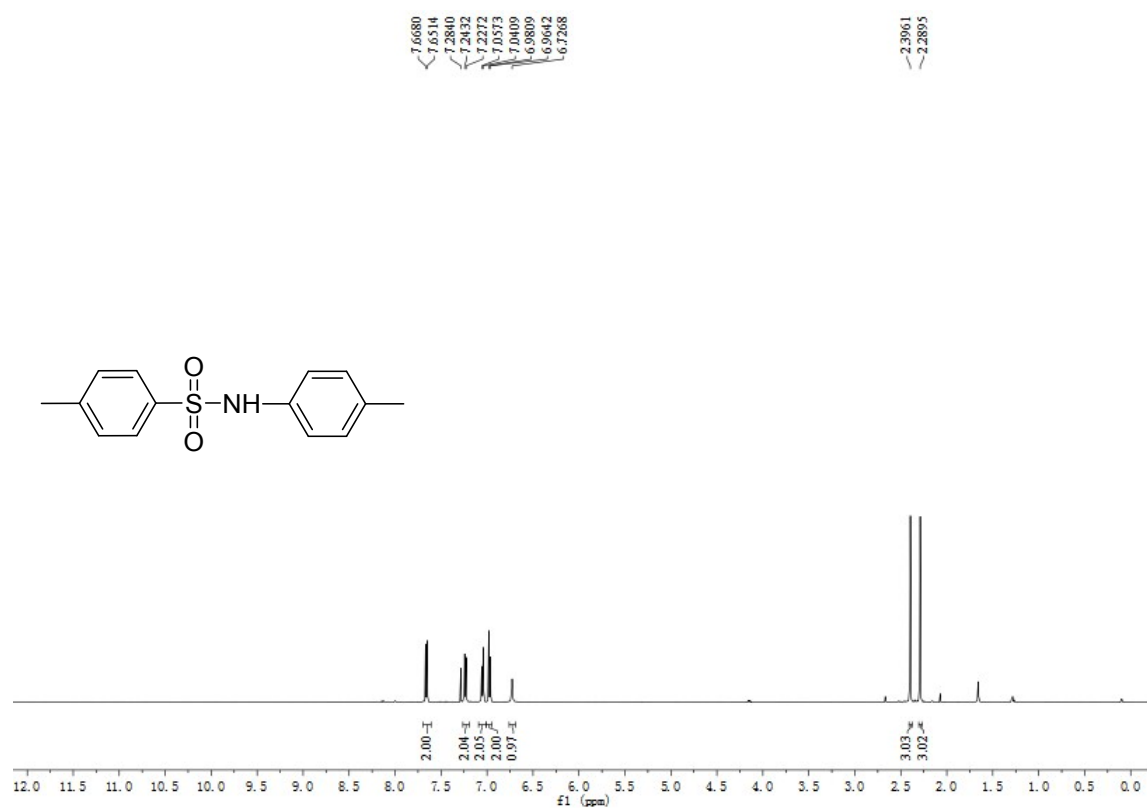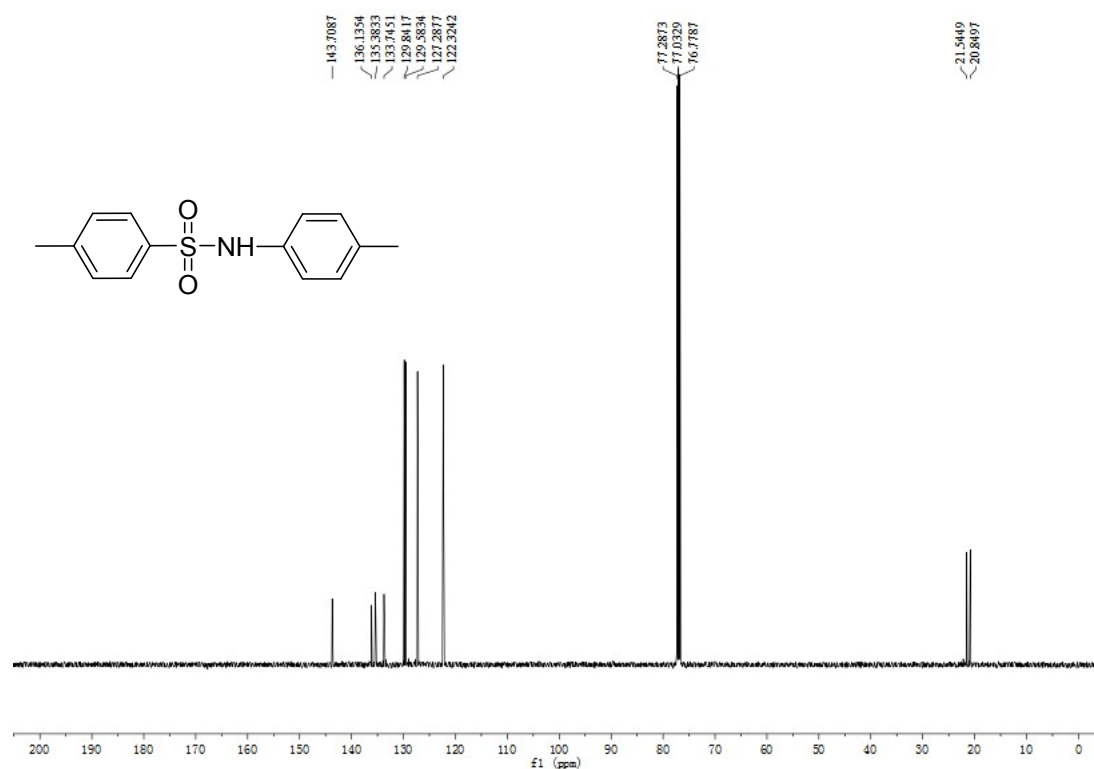

Supplement: c7ob00668c1.pdf [file c7ob00668c1.pdf]
